# Supplementary material for: Cryptic diversity of the subfamily Calaphidinae (Hemiptera: Aphididae) revealed by comprehensive DNA barcoding
Source: PLoS One. 2017 Apr 27;12(4):e0176582. doi: 10.1371/journal.pone.0176582 (PMC5407777; doi:10.1371/journal.pone.0176582)
Supplement: S1 Table — (XLSX) [file pone.0176582.s012.xlsx]

## Sheet: Sheet1
Cryptic Species	최초_보고	Molecular_species_No.	Morphospecies_No.	DNA No.	Genbank accession No.	Voucher No.	Tribe	Subtribe	species	Country	Locality	Geographic coordinates	Date	Plant family	host plant	Collector
		7	7	A11	KY306805	140630YR1-A11	Calaphidini	Calaphidina	Betacallis alnicolens	Korea	Chungcheongbuk-do, Okcheon-gun	36˚18'22''N 127˚34'16''E	30.vi.2014	Betulaceae	Alnus sp.	Yerim Lee
	38	96	92	A6	KY306806	130828YR9-A6	Calaphidini	Calaphidina	Betacallis alnicolens	Korea	Gangwon-do, Taebaek-si, Mt. Hambaeksan	37˚09'41''N 128˚55'03''E	28.viii.2013	Betulaceae	Alnus sp.	Yerim Lee
	38	96	92	A7	KY306807	140501YR12-A7	Calaphidini	Calaphidina	Betacallis alnicolens	Korea	Gangwon-do, Hwacheon-gun, Silnae-pass	38˚09'05''N 127˚31'02''E	1.v.2014	Betulaceae	Alnus sp.	Yerim Lee
		28	27	B66-1	KY306808	140624YR12-B66-1	Calaphidini	Calaphidina	Betacallis sp.	Korea	Gyeongsangbuk-do, Yeongyang-gun, Mt. Ilwolsan	36˚48'05''N 129˚05'53''E	24.vi.2014	Betulaceae	Betula sp.	Yerim Lee
		28	27	B66-2	KY306809	140624YR12-B66-2	Calaphidini	Calaphidina	Betacallis sp.	Korea	Gyeongsangbuk-do, Yeongyang-gun, Mt. Ilwolsan	36˚48'05''N 129˚05'53''E	24.vi.2014	Betulaceae	Betula sp.	Yerim Lee
		22	22	B66-3	KY306810	140624YR12-B66-3	Calaphidini	Calaphidina	Betacallis sp.	Korea	Gyeongsangbuk-do, Yeongyang-gun, Mt. Ilwolsan	36˚48'05''N 129˚05'53''E	24.vi.2014	Betulaceae	Betula sp.	Yerim Lee
		106	98	Pla1	KY306811	090622SH82-Pla1	Calaphidini	Calaphidina	Boernerina occidentalis	China	Jilin-province, Yanbian	42˚54'33''N 129˚28'18''E	22.vi.2009	unknown	unknown	Seunghwan Lee
10		123	110	US3-1	KY306812	150720YR1-US3-1	Calaphidini	Calaphidina	Calaphis flava	USA	California, La Canada Filintridge, Descanso Dr.	34˚05'05''N 118˚16'35''E	20.vii.2015	Betulaceae	Betula sp.	Yerim Lee & Hyoseok Lee
10		123	110	US3-2	KY306813	150720YR1-US3-2	Calaphidini	Calaphidina	Calaphis flava	USA	California, La Canada Filintridge, Descanso Dr.	34˚05'05''N 118˚16'35''E	20.vii.2015	Betulaceae	Betula sp.	Yerim Lee & Hyoseok Lee
		138	117	US3-4	KY306814	150720YR1-US3-4	Calaphidini	Calaphidina	Calaphis flava	USA	California, La Canada Filintridge, Descanso Dr.	34˚05'05''N 118˚16'35''E	20.vii.2015	Betulaceae	Betula sp.	Yerim Lee & Hyoseok Lee
		107	99	M1	KY306815	110910YR1-M1	Calaphidini	Calaphidina	Calaphis magnoliae	Korea	Gyeonggi-do, Icheon-si, Moga-myeon	37˚10'18''N 127˚28'48''E	10.ix.2011	Magnoliaceae	Magnolia denudata	Yerim Lee
9	47	117	105	M17	KY306816	141018YR2-M17	Calaphidini	Calaphidina	Calaphis magnoliae	Korea	Chungcheongbuk-do, Munkyeong-si	36˚35'10''N 128˚11'12''E	18.x.2014	Magnoliaceae	Magnolia denudata	Yerim Lee
	12	37	36	M4	KY306817	130718YR2-M4	Calaphidini	Calaphidina	Calaphis magnoliae	Korea	Seoul, Seongbuk-gu, Anam-dong, Korea University	37˚35'26''N 127˚01'40''E	18.vii.2013	Magnoliaceae	Magnolia denudata	Yerim Lee
	12	37	36	M5	KY306818	130903YR1-M5	Calaphidini	Calaphidina	Calaphis magnoliae	Korea	Seoul, Gwanak-gu, Seoul National University	37˚27'35''N 126˚57'06''E	3.ix.2013	Magnoliaceae	Magnolia denudata	Yerim Lee
		28	27	B23	KY306819	130427YR3-B23	Calaphidini	Calaphidina	Calaphis similis	Korea	Gangwon-do, Chuncheon-si, Nami-Island	37˚47'28''N 127˚31'31''E	27.iv.2013	Betulaceae	Betula platyphylla	Yerim Lee & Hyoseok Lee
		27	26	B27	KY306820	130801YR4-B27	Calaphidini	Calaphidina	Calaphis similis	Korea	Gangwon-do, Inje-gun, Yongdae-recreation forest	38˚11'02''N 128˚21'43''E	1.viii.2013	Betulaceae	Betula sp.	Yerim Lee
	33	81	78	B35	KY306821	130626YR1-B35	Calaphidini	Calaphidina	Calaphis similis	Korea	Seoul, Gwanak-gu, Seoul National University	37˚27'35''N 126˚57'06''E	26.vi.2013	Betulaceae	Betula platyphylla	Yerim Lee
		22	22	B37	KY306822	130626YR1-B37	Calaphidini	Calaphidina	Calaphis similis	Korea	Seoul, Gwanak-gu, Seoul National University	37˚27'35''N 126˚57'06''E	26.vi.2013	Betulaceae	Betula platyphylla	Yerim Lee
		132	111	B42	KY306823	130626YR3-B42	Calaphidini	Calaphidina	Calaphis similis	Korea	Seoul, Gwanak-gu, Seoul National University	37˚27'35''N 126˚57'06''E	26.vi.2013	Betulaceae	Betula platyphylla	Yerim Lee
		33	32	B52	KY306824	130821YR12-B52	Calaphidini	Calaphidina	Calaphis similis	Korea	Gangwon-do, Chiak-Recreational forest	37˚15'21''N 128˚01'52''E	21.viii.2013	Betulaceae	Betula platyphylla	Yerim Lee & Hyoseok Lee
		33	32	B54	KY306825	130908YR7-B54	Calaphidini	Calaphidina	Calaphis similis	Korea	Gangwon-do, Taebaek-si, Mt. Hambaeksan	37˚09'41''N 128˚55'03''E	8.ix.2013	Betulaceae	Betula sp.	Yerim Lee
		27	26	B67	KY306826	140604YR35-B67	Calaphidini	Calaphidina	Calaphis similis	Korea	Gangwon-do, Inje-gun, Pillye-valley	38˚04'22''N 128˚22'15''E	4.vi.2014	Betulaceae	Betula sp.	Yerim Lee
	7	19	19	B80	KY306827	050616HJ5-B80	Calaphidini	Calaphidina	Calaphis similis	Korea	Gangwon-do, Hongcheon-gun, Guryong-ryeong	37˚52'49''N 128˚30'51''E	16.vi.2005	Betulaceae	Betula sp.	Hyojoong Kim
		22	22	Cal1	KY306828	0811010HJ5-Cal1	Calaphidini	Calaphidina	Calaphis similis	Korea	Gyeonggi-do, Osan-si, Sucheong-dong	37˚09'56''N 127˚03'52''E	10.xi.2008	Betulaceae	Betula sp.	Hyojoong Kim
	8	25	25	B47-1	KY306829	130713YR3-B47-1	Calaphidini	Calaphidina	Callipterinella calliptera	Korea	Gyeonggi-do, Yangpyeong-gun, Yongmun-recreation forest	37˚30'58''N 127˚31'09''E	13.vii.2013	Betulaceae	Betula platyphylla	Yerim Lee & Hyoseok Lee
2	9	26	26	B47-2	KY306830	130713YR3-B47-2	Calaphidini	Calaphidina	Callipterinella calliptera	Korea	Gyeonggi-do, Yangpyeong-gun, Yongmun-recreation forest	37˚30'58''N 127˚31'09''E	13.vii.2013	Betulaceae	Betula platyphylla	Yerim Lee & Hyoseok Lee
2	9	26	26	B47-3	KY306831	130713YR3-B47-3	Calaphidini	Calaphidina	Callipterinella calliptera	Korea	Gyeonggi-do, Yangpyeong-gun, Yongmun-recreation forest	37˚30'58''N 127˚31'09''E	13.vii.2013	Betulaceae	Betula platyphylla	Yerim Lee & Hyoseok Lee
	20	57	55	B47-4	KY306832	130713YR3-B47-4	Calaphidini	Calaphidina	Callipterinella calliptera	Korea	Gyeonggi-do, Yangpyeong-gun, Yongmun-recreation forest	37˚30'58''N 127˚31'09''E	13.vii.2013	Betulaceae	Betula platyphylla	Yerim Lee & Hyoseok Lee
		28	27	B51	KY306833	130721YR4-B51	Calaphidini	Calaphidina	Callipterinella calliptera	Korea	Seoul, Gwanak-gu, Seoul National University	37˚27'35''N 126˚57'06''E	21.vii.2013	Betulaceae	Betula platyphylla	Yerim Lee & Hyoseok Lee
	12	37	36	B60	KY306834	140426YR11-B60	Calaphidini	Calaphidina	Callipterinella calliptera	Korea	Seoul, Gwanak-gu, Seoul National University	37˚27'35''N 126˚57'06''E	26.iv.2014	Betulaceae	Betula platyphylla	Yerim Lee & Hyoseok Lee
		27	26	B61	KY306835	140426YR11-B61	Calaphidini	Calaphidina	Callipterinella calliptera	Korea	Seoul, Gwanak-gu, Seoul National University	37˚27'35''N 126˚57'06''E	26.iv.2014	Betulaceae	Betula platyphylla	Yerim Lee & Hyoseok Lee
10		123	110	US3-3	KY306836	150720YR1-US3-3	Calaphidini	Calaphidina	Callipterinella calliptera	USA	California, La Canada Filintridge, Descanso Dr.	34˚05'05''N 118˚16'35''E	20.vii.2015	Betulaceae	Betula sp.	Yerim Lee & Hyoseok Lee
		33	32	B82-1	KY306837	141116YR2-B82-1	Calaphidini	Calaphidina	Callipterinella sp.	USA	Oregon, Portland, Martin Luther King JR. Blvd	45˚33'51''N 122˚39'41''E	16.xi.2014	Betulaceae	Betula sp.	Yerim Lee
		33	32	B82-2	KY306838	141116YR2-B82-2	Calaphidini	Calaphidina	Callipterinella sp.	USA	Oregon, Portland, Martin Luther King JR. Blvd	45˚33'51''N 122˚39'41''E	16.xi.2014	Betulaceae	Betula sp.	Yerim Lee
		106	98	CZ7-1	KY306839	040722SH34-CZ7-1	Calaphidini	Calaphidina	Callipterinella tuberculata	Czech Republic	Praha	50˚04'31''N 14˚26'16''E	22.vii.2004	Betulaceae	Betula sp.	Seunghwan Lee
		106	98	CZ7-2	KY306840	040722SH34-CZ7-2	Calaphidini	Calaphidina	Callipterinella tuberculata	Czech Republic	Praha	50˚04'31''N 14˚26'16''E	22.vii.2004	Betulaceae	Betula sp.	Seunghwan Lee
9	47	117	105	CZ7-3	KY306841	040722SH34-CZ7-3	Calaphidini	Calaphidina	Callipterinella tuberculata	Czech Republic	Praha	50˚04'31''N 14˚26'16''E	22.vii.2004	Betulaceae	Betula sp.	Seunghwan Lee
		116	105	U5	KY306842	140612YR13-U5	Panaphidini	Panaphidina	Chromocallis nirecola	Korea	Gangwon-do, Yeongwol-gun, Sangdong-ri	37˚47'09''N 127˚17'58''E	12.vi.2014	Ulmaceae	Ulmus sp.	Yerim Lee
		106	98	JS1	KY306843	130728YR39-JS1	Panaphidini	Panaphidina	Chromaphis juglandicola	Korea	Chungcheongnam-do, Cheonan-si, Guseong-dong, Cheonan-service area	36˚47'16''N 127˚10'24''E	28.vii.2013	Juglandaceae	Juglans sp.	Yerim Lee & Hyoseok Lee
6	42	101	97	JS2	KY306844	130813YR1-JS2	Panaphidini	Panaphidina	Chromaphis juglandicola	Korea	Gangwon-do, Yangyang-gun, Naehyeon-ri	37˚59'31''N 128˚35'24''E	13.viii.2013	Juglandaceae	Juglans sp.	Yerim Lee
				JS3	KY306845	140524YR1-JS3	Panaphidini	Panaphidina	Chromaphis juglandicola	Korea	Chungcheongnam-do, Gongju-si, Uidang-myeon	36˚29'58''N 127˚08'28''E	24.v.2014	Juglandaceae	Juglans sp.	Yerim Lee
				JS4	KY306846	140524YR1-JS4	Panaphidini	Panaphidina	Chromaphis juglandicola	Korea	Chungcheongnam-do, Gongju-si, Uidang-myeon	36˚29'58''N 127˚08'28''E	24.v.2014	Juglandaceae	Juglans sp.	Yerim Lee
				JS5	KY306847	140524YR2-JS5	Panaphidini	Panaphidina	Chromaphis juglandicola	Korea	Chungcheongnam-do, Cheonan-si, Gwangdeok-myeon	36˚41'54''N 127˚06'40''E	25.v.2014	Juglandaceae	Juglans sp.	Yerim Lee
		24	24	B43	KY306848	130621YR24-B43	Calaphidini	Calaphidina	Clethrobius comes	Korea	Gangwon-do, Inje-gun, Bangtae-recreation forest	37˚55'46''N 128˚23'20''E	21.vi.2013	Betulaceae	Betula costata	Yerim Lee
		27	26	B68	KY306849	140624YR14-B68	Calaphidini	Calaphidina	Clethrobius comes	Korea	Gyeongsangbuk-do, Yeongyang-gun, Mt. Ilwolsan	36˚48'05''N 129˚05'53''E	24.vi.2014	Betulaceae	Betula sp.	Yerim Lee
	41	100	96	B69	KY306850	140604YR1-B69	Calaphidini	Calaphidina	Clethrobius comes	Korea	Gangwon-do, Goseong-gun	38˚22'48''N 128˚28'02''E	4.vi.2014	Betulaceae	Betula sp.	Yerim Lee
	44	105	97	B70	KY306851	140604YR36-B70	Calaphidini	Calaphidina	Clethrobius comes	Korea	Gangwon-do, Inje-gun, Pillye-valley	38˚04'22''N 128˚22'15''E	4.vi.2014	Betulaceae	Betula sp.	Yerim Lee
		33	32	B81	KY306852	050616HJ4-B81	Calaphidini	Calaphidina	Clethrobius comes	Korea	Gangwon-do, Hongcheon-gun, Guryong-ryeong	37˚52'49''N 128˚30'51''E	16.vi.2005	Betulaceae	Betula sp.	Hyojoong Kim
		33	32	B9	KY306853	100521HJ1-B9	Calaphidini	Calaphidina	Clethrobius comes	Korea	Gangwon-do, Hoengseong-gun, Mt. Cheongtaesan	37˚31'19''N 128˚17'25''E	21.v.2010	Betulaceae	Betula sp.	Hyojoong Kim
		107	99	JP1	KY306854	050611-JP1	Calaphidini	Calaphidina	Clethrobius comes	Japan	Hokkaido, Iwamizawa	43˚12'14''N 141˚45'34''E	11.vi.2005	Betulaceae	Betula platyphylla	unknown
9	47	117	105	JM1	KY306855	130725YR21-JM1	Panaphidini	Panaphidina	Dasyaphis rhusae	Korea	Jeollanam-do, Gwangyang-si, Mt. Beakunsan	35˚06'26''N 127˚37'19''E	25.vii.2013	Fagaceae	Quercus sp.	Yerim Lee
9	47	117	105	JM3	KY306856	130801YR7-JM3	Panaphidini	Panaphidina	Dasyaphis rhusae	Korea	Gangwon-do, Inje-gun, Yongdae-recreation forest	38˚11'02''N 128˚21'43''E	1.viii.2013	Fagaceae	Quercus sp.	Yerim Lee
	44	105	97	JP8	KY306857	110922-JP8	Panaphidini	Panaphidina	Dasyaphis rhusae	Japan	Hokkaido, Abashiri	44˚01'14''N 144˚16'24''E	22.ix.2011	Juglandaceae	Juglans mandshurica var.sachalinensis	unknown
11		124	111	CZ2-1	KY306858	040722SH8-CZ2-1	Panaphidini	Panaphidina	Eucallipterus tiliae	Czech Republic	Praha	50˚04'31''N 14˚26'16''E	22.vii.2004	Tiliaceae	Tilia sp.	Seunghwan Lee
11		124	111	CZ2-2	KY306859	040722SH8-CZ2-2	Panaphidini	Panaphidina	Eucallipterus tiliae	Czech Republic	Praha	50˚04'31''N 14˚26'16''E	22.vii.2004	Tiliaceae	Tilia sp.	Seunghwan Lee
11		124	111	CZ2-n1	KY306860	040722SH8-CZ2-n1	Panaphidini	Panaphidina	Eucallipterus tiliae	Czech Republic	Praha	50˚04'31''N 14˚26'16''E	22.vii.2004	Tiliaceae	Tilia sp.	Seunghwan Lee
		126	112	Pol8-1	KY306861	150616LD-Pol8-1	Panaphidini	Panaphidina	Eucallipterus tiliae	Poland	Piekary Śląskie	50˚22'44''N 18˚55'37''E	16.vi.2015	Tiliaceae	Tilia sp.	Ł. Depa
		126	112	Pol8-2	KY306862	150616LD-Pol8-2	Panaphidini	Panaphidina	Eucallipterus tiliae	Poland	Piekary Śląskie	50˚22'44''N 18˚55'37''E	16.vi.2015	Tiliaceae	Tilia sp.	Ł. Depa
		126	112	Pol8-3	KY306863	150616LD-Pol8-3	Panaphidini	Panaphidina	Eucallipterus tiliae	Poland	Piekary Śląskie	50˚22'44''N 18˚55'37''E	16.vi.2015	Tiliaceae	Tilia sp.	Ł. Depa
8	46	114	104	T17-1	KY306864	NZ101120SH26-T17-1	Panaphidini	Panaphidina	Eucallipterus tiliae	New Zealand	Auckland	36˚53'25''S 174˚43'13''E	20.xi.2010	Tiliaceae	Tilia sp.	Seunghwan Lee
	10	30	29	T17-2	KY306865	NZ101120SH26-T17-2	Panaphidini	Panaphidina	Eucallipterus tiliae	New Zealand	Auckland	36˚53'25''S 174˚43'13''E	20.xi.2010	Tiliaceae	Tilia sp.	Seunghwan Lee
				T18-1	KY306866	03CA03-T18-1	Panaphidini	Panaphidina	Eucallipterus tiliae	USA	California	36˚46'41''N 119˚25'04''E	v.2003	Tiliaceae	Tilia sp.	unknown
		113	100	T18-3	KY306867	03CA03-T18-3	Panaphidini	Panaphidina	Eucallipterus tiliae	USA	California	36˚46'41''N 119˚25'04''E	v.2003	Tiliaceae	Tilia sp.	unknown
		33	32	T18-4	KY306868	03CA03-T18-4	Panaphidini	Panaphidina	Eucallipterus tiliae	USA	California	36˚46'41''N 119˚25'04''E	v.2003	Tiliaceae	Tilia sp.	unknown
		33	32	T18-5	KY306869	03CA03-T18-5	Panaphidini	Panaphidina	Eucallipterus tiliae	USA	California	36˚46'41''N 119˚25'04''E	v.2003	Tiliaceae	Tilia sp.	unknown
		116	105	New10	KY306870	NZ101120SH29-New10	Calaphidini	Calaphidina	Euceraphis betulae	New Zealand	Auckland	36˚53'53''S 174˚42'39''E	20.xi.2010	Betulaceae	Betula sp.	Seunghwan Lee
		106	98	Pol1-1	KY306871	150515-Pol1-1	Calaphidini	Calaphidina	Euceraphis betulae	Poland	Katowice	50°15'53''N 19°01'25''E	15.v.2015	Betulaceae	Betula pendula	Mariusz Kanturski
		106	98	Pol1-2	KY306872	150515-Pol1-2	Calaphidini	Calaphidina	Euceraphis betulae	Poland	Katowice	50°15'53''N 19°01'25''E	15.v.2015	Betulaceae	Betula pendula	Mariusz Kanturski
10		123	110	US2	KY306873	150722YR7-US2	Calaphidini	Calaphidina	Euceraphis betulae	USA	California, San francisco, Daly city	37°41'16''N 122°28'12''E	22.vii.2015	Betulaceae	Betula sp.	Yerim Lee & Hyoseok Lee
		33	32	B56	KY306874	130908YR8-B56	Calaphidini	Calaphidina	Euceraphis caerulescens	Korea	Gangwon-do, Taebaek-si, Mt. Hambaeksan	37˚09'41''N 128˚55'03''E	8.ix.2013	Betulaceae	Betula sp.	Yerim Lee & Hyoseok Lee
	19	56	54	B71-1	KY306875	140604YR5-B71-1	Calaphidini	Calaphidina	Euceraphis caerulescens	Korea	Gangwon-do, Goseong-gun	38˚22'48''N 128˚28'02''E	4.vi.2014	Betulaceae	Betula sp.	Yerim Lee & Hyoseok Lee
		27	26	B71-2	KY306876	140604YR5-B71-2	Calaphidini	Calaphidina	Euceraphis caerulescens	Korea	Gangwon-do, Goseong-gun	38˚22'48''N 128˚28'02''E	4.vi.2014	Betulaceae	Betula sp.	Yerim Lee & Hyoseok Lee
		27	26	B71-3	KY306877	140604YR5-B71-3	Calaphidini	Calaphidina	Euceraphis caerulescens	Korea	Gangwon-do, Goseong-gun	38˚22'48''N 128˚28'02''E	4.vi.2014	Betulaceae	Betula sp.	Yerim Lee & Hyoseok Lee
		27	26	B71-4	KY306878	140604YR5-B71-4	Calaphidini	Calaphidina	Euceraphis caerulescens	Korea	Gangwon-do, Goseong-gun	38˚22'48''N 128˚28'02''E	4.vi.2014	Betulaceae	Betula sp.	Yerim Lee & Hyoseok Lee
		27	26	B71-5	KY306879	140604YR5-B71-5	Calaphidini	Calaphidina	Euceraphis caerulescens	Korea	Gangwon-do, Goseong-gun	38˚22'48''N 128˚28'02''E	4.vi.2014	Betulaceae	Betula sp.	Yerim Lee & Hyoseok Lee
		27	26	B71-6	KY306880	140604YR5-B71-6	Calaphidini	Calaphidina	Euceraphis caerulescens	Korea	Gangwon-do, Goseong-gun	38˚22'48''N 128˚28'02''E	4.vi.2014	Betulaceae	Betula sp.	Yerim Lee & Hyoseok Lee
	38	96	92	B17	KY306881	100815SH44-B17	Calaphidini	Calaphidina	Euceraphis papyrifericola	China	Harbin-province	45˚44'46''N 126˚39'10''E	15.viii.2010	Betulaceae	Betula sp.	Seunghwan Lee
		27	26	B19	KY306882	100815SH44-B19	Calaphidini	Calaphidina	Euceraphis papyrifericola	China	Harbin-province	45˚44'46''N 126˚39'10''E	15.viii.2010	Betulaceae	Betula sp.	Seunghwan Lee
		20	20	B22	KY306883	100521HJ1-B22	Calaphidini	Calaphidina	Euceraphis papyrifericola	Korea	Gangwon-do, Hoengseong-gun, Mt. Cheongtaesan	37˚31'19''N 128˚17'25''E	21.v.2010	Betulaceae	Betula sp.	Hyojoong Kim
		29	28	B31	KY306884	130502YR1-B31	Calaphidini	Calaphidina	Euceraphis papyrifericola	Korea	Seoul, Gwanak-gu, Seoul National University	37˚27'35''N 126˚57'06''E	2.v.2013	Betulaceae	Betula platyphylla	Yerim Lee & Hyoseok Lee
		21	21	B33	KY306885	130502YR1-B33	Calaphidini	Calaphidina	Euceraphis papyrifericola	Korea	Seoul, Gwanak-gu, Seoul National University	37˚27'35''N 126˚57'06''E	2.v.2013	Betulaceae	Betula platyphylla	Yerim Lee & Hyoseok Lee
	19	56	54	B40	KY306886	130626YR2-B40	Calaphidini	Calaphidina	Euceraphis papyrifericola	Korea	Seoul, Gwanak-gu, Seoul National University	37˚27'35''N 126˚57'06''E	26.vi.2.13	Betulaceae	Betula platyphylla	Yerim Lee & Hyoseok Lee
		27	26	B72	KY306887	140604YR34-B72	Calaphidini	Calaphidina	Euceraphis papyrifericola	Korea	Gangwon-do, Inje-gun, Pillye-valley	38˚04'22''N 128˚22'15''E	4.vi.2014	Betulaceae	Betula sp.	Yerim Lee
		27	26	B73	KY306888	140604YR21-B73	Calaphidini	Calaphidina	Euceraphis papyrifericola	Korea	Gangwon-do, Samcheok-si, Mt. Eungbongsan	37˚04'44''N 129˚14'15''E	4.vi.2014	Betulaceae	Betula sp.	Yerim Lee
	49	121	109	Eu2-1	KY306889	150517YR-Eu2-1	Calaphidini	Calaphidina	Euceraphis papyrifericola	Korea	Gangwon-do, Hwacheon-gun	38˚06'20''N 127˚42'28''E	17.v.2015	Betulaceae	Betula sp.	Yerim Lee & Hyoseok Lee
	49	121	109	Eu2-2	KY306890	150517YR-Eu2-2	Calaphidini	Calaphidina	Euceraphis papyrifericola	Korea	Gangwon-do, Hwacheon-gun	38˚06'20''N 127˚42'28''E	17.v.2015	Betulaceae	Betula sp.	Yerim Lee & Hyoseok Lee
	49	121	109	Eu2-3	KY306891	150517YR-Eu2-3	Calaphidini	Calaphidina	Euceraphis papyrifericola	Korea	Gangwon-do, Hwacheon-gun	38˚06'20''N 127˚42'28''E	17.v.2015	Betulaceae	Betula sp.	Yerim Lee & Hyoseok Lee
		107	99	Eu2-4	KY306892	150517YR-Eu2-4	Calaphidini	Calaphidina	Euceraphis papyrifericola	Korea	Gangwon-do, Hwacheon-gun	38˚06'20''N 127˚42'28''E	17.v.2015	Betulaceae	Betula sp.	Yerim Lee & Hyoseok Lee
	49	121	109	Eu2-5	KY306893	150517YR-Eu2-5	Calaphidini	Calaphidina	Euceraphis papyrifericola	Korea	Gangwon-do, Hwacheon-gun	38˚06'20''N 127˚42'28''E	17.v.2015	Betulaceae	Betula sp.	Yerim Lee & Hyoseok Lee
	19	56	54	B4-1	KY306894	090622SH80-B4-1	Calaphidini	Calaphidina	Euceraphis sp.	China	Jilin-province, Yanbian	42˚54'33''N 129˚28'18''E	22.vi.2009	Betulaceae	Betula sp.	Seunghwan Lee
		23	23	B4-2	KY306895	090622SH80-B4-2	Calaphidini	Calaphidina	Euceraphis sp.	China	Jilin-province, Yanbian	42˚54'33''N 129˚28'18''E	22.vi.2009	Betulaceae	Betula sp.	Seunghwan Lee
		24	24	B4-3	KY306896	090622SH80-B4-3	Calaphidini	Calaphidina	Euceraphis sp.	China	Jilin-province, Yanbian	42˚54'33''N 129˚28'18''E	22.vi.2009	Betulaceae	Betula sp.	Seunghwan Lee
	8	25	25	B4-4	KY306897	090622SH80-B4-4	Calaphidini	Calaphidina	Euceraphis sp.	China	Jilin-province, Yanbian	42˚54'33''N 129˚28'18''E	22.vi.2009	Betulaceae	Betula sp.	Seunghwan Lee
		28	27	B5	KY306898	090622SH80-B5	Calaphidini	Calaphidina	Euceraphis sp.	China	Jilin-province, Yanbian	42˚54'33''N 129˚28'18''E	22.vi.2009	Betulaceae	Betula sp.	Seunghwan Lee
	44	105	97	B7	KY306899	090622SH89-B7	Calaphidini	Calaphidina	Euceraphis sp.	China	Jilin-province, Yanbian	42˚54'33''N 129˚28'18''E	22.vi.2009	Betulaceae	Betula sp.	Seunghwan Lee
	49	121	109	Eu1	KY306900	090622SH80-Eu1	Calaphidini	Calaphidina	Euceraphis sp.	China	Jilin-province, Yanbian	42˚54'33''N 129˚28'18''E	22.vi.2009	Betulaceae	Betula sp.	Seunghwan Lee
		21	21	Ca2	KY306901	130725YR23-Ca2	Panaphidini	Panaphidina	Mesocallis (Mesocallis) pteleae	Korea	Jeollanam-do, Gwangyang-si, Mt. Beakunsan	35˚06'26''N 127˚37'19''E	25.vii.2013	Betulaceae	Carpinus sp.	Yerim Lee
8	46	114	104	Co10-1	KY306902	140510YR1-Co10-1	Panaphidini	Panaphidina	Mesocallis (Mesocallis) pteleae	Korea	Chungcheongnam-do, Cheongyang-gun, Mt. Chilgapsan	36˚24'48''N 126˚53'03''E	10.v.2014	Betulaceae	Corylus sp.	Yerim Lee & Hyoseok Lee
		27	26	Co10-2	KY306903	140510YR1-Co10-2	Panaphidini	Panaphidina	Mesocallis (Mesocallis) pteleae	Korea	Chungcheongnam-do, Cheongyang-gun, Mt. Chilgapsan	36˚24'48''N 126˚53'03''E	10.v.2014	Betulaceae	Corylus sp.	Yerim Lee & Hyoseok Lee
		33	32	Co10-3	KY306904	140510YR1-Co10-3	Panaphidini	Panaphidina	Mesocallis (Mesocallis) pteleae	Korea	Chungcheongnam-do, Cheongyang-gun, Mt. Chilgapsan	36˚24'48''N 126˚53'03''E	10.v.2014	Betulaceae	Corylus sp.	Yerim Lee & Hyoseok Lee
	41	100	96	Co10-4	KY306905	140510YR1-Co10-4	Panaphidini	Panaphidina	Mesocallis (Mesocallis) pteleae	Korea	Chungcheongnam-do, Cheongyang-gun, Mt. Chilgapsan	36˚24'48''N 126˚53'03''E	10.v.2014	Betulaceae	Corylus sp.	Yerim Lee & Hyoseok Lee
	41	100	96	Co10-n1	KY306906	140510YR1-Co10-n1	Panaphidini	Panaphidina	Mesocallis (Mesocallis) pteleae	Korea	Chungcheongnam-do, Cheongyang-gun, Mt. Chilgapsan	36˚24'48''N 126˚53'03''E	10.v.2014	Betulaceae	Corylus sp.	Yerim Lee & Hyoseok Lee
	41	100	96	Co10-n2	KY306907	140510YR1-Co10-n2	Panaphidini	Panaphidina	Mesocallis (Mesocallis) pteleae	Korea	Chungcheongnam-do, Cheongyang-gun, Mt. Chilgapsan	36˚24'48''N 126˚53'03''E	10.v.2014	Betulaceae	Corylus sp.	Yerim Lee & Hyoseok Lee
		33	32	Co10-n3	KY306908	140510YR1-Co10-n3	Panaphidini	Panaphidina	Mesocallis (Mesocallis) pteleae	Korea	Chungcheongnam-do, Cheongyang-gun, Mt. Chilgapsan	36˚24'48''N 126˚53'03''E	10.v.2014	Betulaceae	Corylus sp.	Yerim Lee & Hyoseok Lee
	16	41	39	Co20	KY306909	140510YR1-Co20	Panaphidini	Panaphidina	Mesocallis (Mesocallis) pteleae	Korea	Chungcheongnam-do, Cheongyang-gun, Mt. Chilgapsan	36˚24'48''N 126˚53'03''E	10.v.2014	Betulaceae	Corylus sp.	Yerim Lee & Hyoseok Lee
		135	114	Ca10	KY306910	140604YR42-Ca10	Panaphidini	Panaphidina	Mesocallis (Mesocallis) sawashibae	Korea	Gangwon-do, Inje-gun, Yongdae-recreation forest	38˚11'02''N 128˚21'43''E	4.vi.2014	Betulaceae	Carpinus sp.	Yerim Lee
		27	26	Ca4	KY306911	130802YR1-Ca4	Panaphidini	Panaphidina	Mesocallis (Mesocallis) sawashibae	Korea	Gyeonggi-do, Pocheon-si, Soheul-eub	37˚49'24''N 127˚08'18''E	2.viii.2013	Betulaceae	Carpinus laxiflora	Yerim Lee
		33	32	Ca5-2	KY306912	130926Ram6-Ca5-2	Panaphidini	Panaphidina	Mesocallis (Mesocallis) sawashibae	Korea	Gangwon-do, Inje-gun, Girin-myeon	37˚57'19''N 128˚19'09''E	26.ix.2013	Betulaceae	Carpinus sp.	Ram Duwal Kwshari
		22	22	Ca5-3	KY306913	130926Ram6-Ca5-3	Panaphidini	Panaphidina	Mesocallis (Mesocallis) sawashibae	Korea	Gangwon-do, Inje-gun, Girin-myeon	37˚57'19''N 128˚19'09''E	26.ix.2013	Betulaceae	Carpinus sp.	Ram Duwal Kwshari
		22	22	Ca5-4	KY306914	130926Ram6-Ca5-4	Panaphidini	Panaphidina	Mesocallis (Mesocallis) sawashibae	Korea	Gangwon-do, Inje-gun, Girin-myeon	37˚57'19''N 128˚19'09''E	26.ix.2013	Betulaceae	Carpinus sp.	Ram Duwal Kwshari
		22	22	Ca9	KY306915	140621YR3-Ca9	Panaphidini	Panaphidina	Mesocallis (Mesocallis) sawashibae	Korea	Gyeonggi-do, Incheon-si, Ganghwa-Island, Mt. Manisan	37˚36'41''N 126˚26'05''E	21.vi.2014	Betulaceae	Carpinus turczaninowii	Yerim Lee & Hyoseok Lee
	12	37	36	Mes1-2	KY306916	150503YR11-Mes1-2	Panaphidini	Panaphidina	Mesocallis (Mesocallis) sp.	Korea	Gyeongsangnam-do, Goseong-gun, Maam-myeon	35˚02'48''N 128˚24'44''E	3.v.2015	Betulaceae	Carpinus laxiflora	Yerim Lee & Hyoseok Lee
6	42	101	97	Mes1-3	KY306917	150503YR11-Mes1-3	Panaphidini	Panaphidina	Mesocallis (Mesocallis) sp.	Korea	Gyeongsangnam-do, Goseong-gun, Maam-myeon	35˚02'48''N 128˚24'44''E	3.v.2015	Betulaceae	Carpinus laxiflora	Yerim Lee & Hyoseok Lee
6	42	101	97	Mes1-4	KY306918	150503YR11-Mes1-4	Panaphidini	Panaphidina	Mesocallis (Mesocallis) sp.	Korea	Gyeongsangnam-do, Goseong-gun, Maam-myeon	35˚02'48''N 128˚24'44''E	3.v.2015	Betulaceae	Carpinus laxiflora	Yerim Lee & Hyoseok Lee
6	42	101	97	Mes1-5	KY306919	150503YR11-Mes1-5	Panaphidini	Panaphidina	Mesocallis (Mesocallis) sp.	Korea	Gyeongsangnam-do, Goseong-gun, Maam-myeon	35˚02'48''N 128˚24'44''E	3.v.2015	Betulaceae	Carpinus laxiflora	Yerim Lee & Hyoseok Lee
		133	112	Co11	KY306920	140509YR10-Co11	Panaphidini	Panaphidina	Mesocallis (Paratinocallis) corylicola	Korea	Gyeonggi-do, Gapyeong-gun, Mt. Jugeumsan	38˚08'38''N 126˚54'17''E	9.v.2014	Betulaceae	Corylus heterophylla	Yerim Lee
		133	112	Co12	KY306921	140516YR12-Co12	Panaphidini	Panaphidina	Mesocallis (Paratinocallis) corylicola	Korea	Gyeonggi-do, Yongin-si, Sinwon-ri	37˚18'47''N 127˚13'04''E	16.v.2014	Betulaceae	Corylus heterophylla	Yerim Lee & Hyoseok Lee
				Co14	KY306922	140714YR7-Co14	Panaphidini	Panaphidina	Mesocallis (Paratinocallis) corylicola	Korea	Gyeongsangnam-do, Geoje-Island	34˚53'12''N 128˚37'25''E	14.vii.2014	Betulaceae	Corylus sieboldiana	Yerim Lee & Hyoseok Lee
				Co15-1	KY306923	140612YR23-Co15-1	Panaphidini	Panaphidina	Mesocallis (Paratinocallis) corylicola	Korea	Gangwon-do, Yeongwol-gun, Sangdong-ri	37˚47'09''N 127˚17'58''E	12.vi.2014	Betulaceae	Corylus heterophylla	Yerim Lee
		133	112	Co15-2	KY306924	140612YR23-Co15-2	Panaphidini	Panaphidina	Mesocallis (Paratinocallis) corylicola	Korea	Gangwon-do, Yeongwol-gun, Sangdong-ri	37˚47'09''N 127˚17'58''E	12.vi.2014	Betulaceae	Corylus sieboldiana	Yerim Lee
		133	112	Co16-1	KY306925	140526YR1-Co16-1	Panaphidini	Panaphidina	Mesocallis (Paratinocallis) corylicola	Korea	Gyeonggi-do, Gapyeong-gun, Mt. Hwayasan	37˚40'17''N 127˚25'40''E	26.v.2014	Betulaceae	Corylus heterophylla	Yerim Lee
12		128	114	Co16-n1	KY306926	140526YR1-Co16-n1	Panaphidini	Panaphidina	Mesocallis (Paratinocallis) corylicola	Korea	Gyeonggi-do, Gapyeong-gun, Mt. Hwayasan	37˚40'17''N 127˚25'40''E	26.v.2014	Betulaceae	Corylus heterophylla	Yerim Lee
		129	114	Co16-n2	KY306927	140526YR1-Co16-n2	Panaphidini	Panaphidina	Mesocallis (Paratinocallis) corylicola	Korea	Gyeonggi-do, Gapyeong-gun, Mt. Hwayasan	37˚40'17''N 127˚25'40''E	26.v.2014	Betulaceae	Corylus heterophylla	Yerim Lee
		133	112	Co16-n3	KY306928	140526YR1-Co16-n3	Panaphidini	Panaphidina	Mesocallis (Paratinocallis) corylicola	Korea	Gyeonggi-do, Gapyeong-gun, Mt. Hwayasan	37˚40'17''N 127˚25'40''E	26.v.2014	Betulaceae	Corylus heterophylla	Yerim Lee
		107	99	Co2	KY306929	130725YR22-Co2	Panaphidini	Panaphidina	Mesocallis (Paratinocallis) corylicola	Korea	Jeollanam-do, Gwangyang-si, Mt. Beakunsan	35˚06'26''N 127˚37'19''E	25.vii.2013	Betulaceae	Corylus sieboldiana	Yerim Lee
	16	41	39	Co3	KY306930	130725YR22-Co3	Panaphidini	Panaphidina	Mesocallis (Paratinocallis) corylicola	Korea	Jeollanam-do, Gwangyang-si, Mt. Beakunsan	35˚06'26''N 127˚37'19''E	25.vii.2013	Betulaceae	Corylus sieboldiana	Yerim Lee
	14	39	38	Co4	KY306931	130814YR4-Co4	Panaphidini	Panaphidina	Mesocallis (Paratinocallis) corylicola	Korea	Gangwon-do, Yangyang-gun, Mt. Manwolsan	37˚57'11''N 128˚41'37''E	14.viii.2013	Betulaceae	Corylus sieboldiana	Yerim Lee
	14	39	38	Co5	KY306932	130814YR4-Co5	Panaphidini	Panaphidina	Mesocallis (Paratinocallis) corylicola	Korea	Gangwon-do, Yangyang-gun, Mt. Manwolsan	37˚57'11''N 128˚41'37''E	14.viii.2013	Betulaceae	Corylus sieboldiana	Yerim Lee
3	15	40	37	Co6-1	KY306933	130815YR11-Co6-1	Panaphidini	Panaphidina	Mesocallis (Paratinocallis) corylicola	Korea	Gangwon-do, Pyeongchang-gun, Chahang-ri, Mt. Hwangbyeongsan	37˚42'27''N 128˚41'14''E	15.viii.2013	Betulaceae	Corylus sieboldiana	Yerim Lee
3	15	40	37	Co6-2	KY306934	130815YR11-Co6-2	Panaphidini	Panaphidina	Mesocallis (Paratinocallis) corylicola	Korea	Gangwon-do, Pyeongchang-gun, Chahang-ri, Mt. Hwangbyeongsan	37˚42'27''N 128˚41'14''E	15.viii.2013	Betulaceae	Corylus sieboldiana	Yerim Lee
		106	98	Co6-3	KY306935	130815YR11-Co6-3	Panaphidini	Panaphidina	Mesocallis (Paratinocallis) corylicola	Korea	Gangwon-do, Pyeongchang-gun, Chahang-ri, Mt. Hwangbyeongsan	37˚42'27''N 128˚41'14''E	15.viii.2013	Betulaceae	Corylus sieboldiana	Yerim Lee
		106	98	Co6-4	KY306936	130815YR11-Co6-4	Panaphidini	Panaphidina	Mesocallis (Paratinocallis) corylicola	Korea	Gangwon-do, Pyeongchang-gun, Chahang-ri, Mt. Hwangbyeongsan	37˚42'27''N 128˚41'14''E	15.viii.2013	Betulaceae	Corylus sieboldiana	Yerim Lee
		106	98	Co6-5	KY306937	130815YR11-Co6-5	Panaphidini	Panaphidina	Mesocallis (Paratinocallis) corylicola	Korea	Gangwon-do, Pyeongchang-gun, Chahang-ri, Mt. Hwangbyeongsan	37˚42'27''N 128˚41'14''E	15.viii.2013	Betulaceae	Corylus sieboldiana	Yerim Lee
		106	98	Co8-1	KY306938	140501YR14-Co8-1	Panaphidini	Panaphidina	Mesocallis (Paratinocallis) corylicola	Korea	Gangwon-do, Hwacheon-gun, Silnae-pass	38˚09'05''N 127˚31'02''E	1.v.2014	Betulaceae	Corylus sieboldiana	Yerim Lee
		106	98	Co8-n1	KY306939	140501YR14-Co8-n1	Panaphidini	Panaphidina	Mesocallis (Paratinocallis) corylicola	Korea	Gangwon-do, Hwacheon-gun, Silnae-pass	38˚09'05''N 127˚31'02''E	1.v.2014	Betulaceae	Corylus sieboldiana	Yerim Lee
11		124	111	Co8-n2	KY306940	140501YR14-Co8-n2	Panaphidini	Panaphidina	Mesocallis (Paratinocallis) corylicola	Korea	Gangwon-do, Hwacheon-gun, Silnae-pass	38˚09'05''N 127˚31'02''E	1.v.2014	Betulaceae	Corylus sieboldiana	Yerim Lee
11		124	111	Co9	KY306941	140501YR15-Co9	Panaphidini	Panaphidina	Mesocallis (Paratinocallis) corylicola	Korea	Gangwon-do, Hwacheon-gun, Silnae-pass	38˚09'05''N 127˚31'02''E	1.v.2014	Betulaceae	Corylus heterophylla	Yerim Lee
6	42	101	97	Mes3-1	KY306942	150424YR-Mes3-1	Panaphidini	Panaphidina	Mesocallis (Paratinocallis) corylicola	Korea	Chungcheongnam-do, Gongju-si, Mt. Gyeryongsan	36˚20'33''N 127˚12'21''E	24.iv.2015	Betulaceae	Corylus heterophylla	Yerim Lee & Hyoseok Lee
6	42	101	97	Mes3-2	KY306943	150425YR-Mes3-2	Panaphidini	Panaphidina	Mesocallis (Paratinocallis) corylicola	Korea	Chungcheongnam-do, Gongju-si, Mt. Gyeryongsan	36˚20'33''N 127˚12'21''E	24.iv.2015	Betulaceae	Corylus heterophylla	Yerim Lee & Hyoseok Lee
6	42	101	97	Mes5-1	KY306944	150510YR-Mes5-1	Panaphidini	Panaphidina	Mesocallis (Paratinocallis) corylicola	Korea	Gyeonggi-do, Suwon-si, Mt. Gwanggyosan	37˚19'40''N 127˚00'54''E	10.v.2015	Betulaceae	Corylus heterophylla	Yerim Lee & Hyoseok Lee
		103	99	Mes5-n1	KY306945	150510YR-Mes5-n1	Panaphidini	Panaphidina	Mesocallis (Paratinocallis) corylicola	Korea	Gyeonggi-do, Suwon-si, Mt. Gwanggyosan	37˚19'40''N 127˚00'54''E	10.v.2015	Betulaceae	Corylus heterophylla	Yerim Lee & Hyoseok Lee
		103	99	Mo1-1	KY306946	150530YR1-Mo1-1	Calaphidini	Calaphidina	Monaphis antennata	Korea	Gangwon-do, Hwacheon-gun, Haesanryong	38˚11'16''N 127˚47'10''E	30.v.2015	Betulaceae	Betula ermani	Yerim Lee & Hyoseok Lee
		107	99	Mo1-2	KY306947	150530YR1-Mo1-2	Calaphidini	Calaphidina	Monaphis antennata	Korea	Gangwon-do, Hwacheon-gun, Haesanryong	38˚11'16''N 127˚47'10''E	30.v.2015	Betulaceae	Betula ermani	Yerim Lee & Hyoseok Lee
		107	99	Mo1-3	KY306948	150530YR1-Mo1-3	Calaphidini	Calaphidina	Monaphis antennata	Korea	Gangwon-do, Hwacheon-gun, Haesanryong	38˚11'16''N 127˚47'10''E	30.v.2015	Betulaceae	Betula ermani	Yerim Lee & Hyoseok Lee
		107	99	Mo1-4	KY306949	150530YR1-Mo1-4	Calaphidini	Calaphidina	Monaphis antennata	Korea	Gangwon-do, Hwacheon-gun, Haesanryong	38˚11'16''N 127˚47'10''E	30.v.2015	Betulaceae	Betula ermani	Yerim Lee & Hyoseok Lee
	49	121	109	Mo1-5	KY306950	150530YR1-Mo1-5	Calaphidini	Calaphidina	Monaphis antennata	Korea	Gangwon-do, Hwacheon-gun, Haesanryong	38˚11'16''N 127˚47'10''E	30.v.2015	Betulaceae	Betula ermani	Yerim Lee & Hyoseok Lee
7	45	108	99	Pol2	KY306951	150515MK-Pol2	Calaphidini	Calaphidina	Monaphis antennata	Poland	Katowice	50°15'53''N 19°01'25''E	15.v.2015	Betulaceae	Betula pendula	Mariusz Kanturski
11		124	111	CZ1	KY306952	040722SH10-CZ1	Panaphidini	Myzocallidina	Myzocallis (Lineomyzocallis) walshii	Czech Republic	Praha	50˚04'31''N 14˚26'16''E	22.vii.2004	unknown	unknown	Seunghwan Lee
	48	120	108	New2	KY306953	101120SH10-New2	Panaphidini	Myzocallidina	Myzocallis (Myzocallis) boerneri	New Zealand	Auckland	36˚53'53''S 174˚42'39''E	20.xi.2010	Fagaceae	Quercus sp.	Seunghwan Lee
9	47	117	105	New3	KY306954	101120SH10-New3	Panaphidini	Myzocallidina	Myzocallis (Myzocallis) boerneri	New Zealand	Auckland	36˚53'53''S 174˚42'39''E	20.xi.2010	Fagaceae	Quercus sp.	Seunghwan Lee
				New5	KY306955	101120SH11-New5	Panaphidini	Myzocallidina	Myzocallis (Myzocallis) boerneri	New Zealand	Auckland	36˚53'53''S 174˚42'39''E	20.xi.2010	Fagaceae	Quercus sp.	Seunghwan Lee
		106	98	CZ6	KY306956	040722SH36-CZ6	Panaphidini	Myzocallidina	Myzocallis (Myzocallis) carpini	Czech Republic	Praha	50˚04'31''N 14˚26'16''E	22.vii.2004	unknown	unknown	Seunghwan Lee
9	47	117	105	Pol6-1	KY306957	150519MK-Pol6-1	Panaphidini	Myzocallidina	Myzocallis (Myzocallis) carpini	Poland	Piekary Śląskie	50˚22'44''N 18˚55'37''E	19.v.2015	Betulaceae	Carpinus betulus	Mariusz Kanturski
		125	111	Pol6-2	KY306958	150519MK-Pol6-2	Panaphidini	Myzocallidina	Myzocallis (Myzocallis) carpini	Poland	Piekary Śląskie	50˚22'44''N 18˚55'37''E	19.v.2015	Betulaceae	Carpinus betulus	Mariusz Kanturski
		134	113	Z15-1	KY306959	141118YR3-Z15-1	Panaphidini	Myzocallidina	Myzocallis (Myzocallis) carpini	USA	Oregon, Portland, Martin Luther King JR. Blvd	45˚33'51''N 122˚39'41''E	18.xi.2014	Betulaceae	Carpinus sp.	Yerim Lee
11		124	111	Z15-2	KY306960	141118YR3-Z15-2	Panaphidini	Myzocallidina	Myzocallis (Myzocallis) carpini	USA	Oregon, Portland, Martin Luther King JR. Blvd	45˚33'51''N 122˚39'41''E	18.xi.2014	Betulaceae	Carpinus sp.	Yerim Lee
		123	110	US1-1	KY306961	150721YR1-US1-1	Panaphidini	Myzocallidina	Myzocallis (Myzocallis) occidentalis	USA	California, Gorman School RD	34˚47'41''N 118˚51'08''E	21.vii.2015	Fagaceae	Quercus sp.	Yerim Lee & Hyoseok Lee
		123	110	US1-2	KY306962	150721YR1-US1-2	Panaphidini	Myzocallidina	Myzocallis (Myzocallis) occidentalis	USA	California, Gorman School RD	34˚47'41''N 118˚51'08''E	21.vii.2015	Fagaceae	Quercus sp.	Yerim Lee & Hyoseok Lee
				UCD4-1	KY306963	150722YR4-UCD4-1	Panaphidini	Myzocallidina	Myzocallis (Neomyzocallis) punctata	USA	California, Davis, Shields Ave	38˚32'24''N 121˚45'00''E	22.vii.2015	Fagaceae	Quercus sp.	Yerim Lee & Hyoseok Lee
12		128	114	UCD4-2	KY306964	150722YR4-UCD4-2	Panaphidini	Myzocallidina	Myzocallis (Neomyzocallis) punctata	USA	California, Davis, Shields Ave	38˚32'24''N 121˚45'00''E	22.vii.2015	Fagaceae	Quercus sp.	Yerim Lee & Hyoseok Lee
				USD1-1	KY306965	151116YR1-USD1-1	Panaphidini	Myzocallidina	Myzocallis (Neomyzocallis) punctata	USA	California, Cabazon, Seminole Dr.	33˚55'09''N 116˚46'56''E	16.xi.2015	Fagaceae	Quercus sp.	Yerim Lee
				USD1-2	KY306966	151116YR1-USD1-2	Panaphidini	Myzocallidina	Myzocallis (Neomyzocallis) punctata	USA	California, Cabazon, Seminole Dr.	33˚55'09''N 116˚46'56''E	16.xi.2015	Fagaceae	Quercus sp.	Yerim Lee
				USL-1	KY306967	151115YR1-USL-1	Panaphidini	Myzocallidina	Myzocallis (Neomyzocallis) punctata	USA	Nevada, Las vegas	36˚19'35''N 114˚51'31''E	15.xi.2015	Fagaceae	Quercus sp.	Yerim Lee
		21	21	B29-1	KY306968	130908YR15-B29-1	Calaphidini	Calaphidina	Neobetulaphis pusilla	Korea	Gangwon-do, Taebaek-si, Mt. Hambaeksan	37˚09'41''N 128˚55'03''E	8.ix.2013	Betulaceae	Betula sp.	Yerim Lee & Hyoseok Lee
		27	26	B29-2	KY306969	130908YR15-B29-2	Calaphidini	Calaphidina	Neobetulaphis pusilla	Korea	Gangwon-do, Taebaek-si, Mt. Hambaeksan	37˚09'41''N 128˚55'03''E	8.ix.2013	Betulaceae	Betula sp.	Yerim Lee & Hyoseok Lee
		27	26	Ca11	KY306970	140801YR6-Ca11	Panaphidini	Panaphidina	Neochromaphis carpinicola	Korea	Jeju-Island, Jeju-si, near by Seongpanak	33˚24'02''N 126˚37'06''E	1.viii.2014	Betulaceae	Carpinus sp.	Yerim Lee
				Ca12	KY306971	140621YR4-Ca12	Panaphidini	Panaphidina	Neochromaphis carpinicola	Korea	Gyeonggi-do, Incheon-si, Ganghwa-Island, Mt. Manisan	37˚36'41''N 126˚26'05''E	21.vi.2014	Betulaceae	Carpinus turczaninowii	Yerim Lee & Hyoseok Lee
		27	26	Co1	KY306972	20130514YR1-Co1	Panaphidini	Panaphidina	Neochromaphis coryli	Korea	Gyeonggi-do, Anyang-si, Anyang SNU-arboretum	37˚24'59''N 126˚55'54''E	14.v.2013	Betulaceae	Corylus sp.	Yerim Lee
		106	98	Co17	KY306973	140612YR7-Co17	Panaphidini	Panaphidina	Neochromaphis coryli	Korea	Gangwon-do, Yeongwol-gun, Nam-myeon, Changwon-ri	37˚10'08''N 128˚21'51''E	12.vi.2014	Betulaceae	Corylus sp.	Yerim Lee
		102	98	JS7-3	KY306974	030513SH10-JS7-3	Panaphidini	Panaphidina	Panaphis juglandis	Korea	Jeju-Island, Jeju-si	33˚29'58''N 126˚31'52''E	13.v.2003	Juglandaceae	Juglans sp.	Seunghwan Lee
		118	106	U6	KY306975	140526YR4-U6	Panaphidini	Panaphidina	Pseudochromaphis coreana	Korea	Gyeonggi-do, Gapyeong-gun, Mt. Hwayasan	37˚40'17''N 127˚25'40''E	26.v.2014	Ulmaceae	Ulmus sp.	Yerim Lee
		119	107	U7	KY306976	140612YR10-U7	Panaphidini	Panaphidina	Pseudochromaphis coreana	Korea	Gangwon-do, Yeongwol-gun, Nam-myeon, Changwon-ri	37˚10'08''N 128˚21'51''E	12.vi.2014	Ulmaceae	Ulmus sp.	Yerim Lee
		106	98	CZ5	KY306977	040722SH9-CZ5	Panaphidini	Panaphidina	Pterocallis (Pterocallis) alni	Czech Republic	Praha	50˚04'31''N 14˚26'16''E	22.vii.2004	Betulaceae	Alnus sp.	Seunghwan Lee
		22	22	Ca13	KY306978	140621YR2-Ca13	Panaphidini	Panaphidina	Pterocallis (Pterocallis) heterophylla	Korea	Gyeonggi-do, Incheon-si, Ganghwa-Island, Mt. Mani	37˚36'41''N 126˚26'05''E	21.vi.2014	Betulaceae	Carpinus turczaninowii	Yerim Lee & Hyoseok Lee
		21	21	Ca14	KY306979	140714YR5-Ca14	Panaphidini	Panaphidina	Pterocallis (Pterocallis) heterophylla	Korea	Gyeongsangnam-do, Geoje-Island	34˚53'12''N 128˚37'25''E	14.vii.2014	Betulaceae	Carpinus turczaninowii	Yerim Lee & Hyoseok Lee
		1	1	A10	KY306980	140511YR1-A10	Panaphidini	Panaphidina	Pterocallis (Recticallis) alnijaponicae	Korea	Seoul, Gwanak-gu, Seoul National University	37˚27'35''N 126˚57'06''E	11.v.2014	Betulaceae	Alnus hirsuta	Yerim Lee & Hyoseok Lee
2	9	26	26	A2	KY306981	130829YR10-A2	Panaphidini	Panaphidina	Pterocallis (Recticallis) alnijaponicae	Korea	Gangwon-do, Gangreung-si, Sagamak-ri, Ungyebong	37˚48'19''N 128˚47'09''E	29.viii.2013	Betulaceae	Alnus sp.	Yerim Lee & Hyoseok Lee
2	9	26	26	A3	KY306982	130718YR1-A3	Panaphidini	Panaphidina	Pterocallis (Recticallis) alnijaponicae	Korea	Seoul, Gwanak-gu, Seoul National University	37˚27'35''N 126˚57'06''E	18.vii.2013	Betulaceae	Alnus hirsuta	Yerim Lee
		27	26	A4	KY306983	130814YR6-A4	Panaphidini	Panaphidina	Pterocallis (Recticallis) alnijaponicae	Korea	Gangwon-do, Ganreung-si, Myeongju-gun, Cheolgap-ryeong	37˚45'67''N 128˚52'33''E	14.viii.2013	Betulaceae	Alnus sp.	Yerim Lee
	44	105	97	A5	KY306984	130814YR6-A5	Panaphidini	Panaphidina	Pterocallis (Recticallis) alnijaponicae	Korea	Gangwon-do, Ganreung-si, Myeongju-gun, Cheolgap-ryeong	37˚45'67''N 128˚52'33''E	14.viii.2013	Betulaceae	Alnus sp.	Yerim Lee
	38	96	92	A9	KY306985	140511YR1-A9	Panaphidini	Panaphidina	Pterocallis (Recticallis) alnijaponicae	Korea	Seoul, Gwanak-gu, Seoul National University	37˚27'35''N 126˚57'06''E	11.v.2014	Betulaceae	Alnus hirsuta	Yerim Lee & Hyoseok Lee
		133	112	Co13-1	KY306986	140604YR44-Co13-1	Panaphidini	Panaphidina	Pterocallis (Recticallis) alnijaponicae	Korea	Gangwon-do, Inje-gun, Yongdae-recreation forest	38˚11'02''N 128˚21'43''E	4.vi.2014	Betulaceae	Corylus sp.	Yerim Lee
		133	112	Co13-2	KY306987	140604YR44-Co13-2	Panaphidini	Panaphidina	Pterocallis (Recticallis) alnijaponicae	Korea	Gangwon-do, Inje-gun, Yongdae-recreation forest	38˚11'02''N 128˚21'43''E	4.vi.2014	Betulaceae	Corylus sp.	Yerim Lee
	2	3	3	A12	KY306988	140801YR9-A12	Panaphidini	Panaphidina	Pterocallis (Recticallis) nigrostriata	Korea	Jeju-Island, Jeju-si, near by Seongpanak	33˚24'02''N 126˚37'06''E	1.viii.2014	Betulaceae	Alnus firma	Yerim Lee
		126	112	Pte1-1	KY306989	140714YR13-Pte1-1	Panaphidini	Panaphidina	Pterocallis (Recticallis) nigrostriata	Korea	Gyeongsangnam-do, Namheae-gun	34˚50'15''N 127˚53'32''E	14.vii.2014	Betulaceae	Alnus firma	Yerim Lee & Hyoseok Lee
	16	41	39	Pte1-2	KY306990	140714YR13-Pte1-2	Panaphidini	Panaphidina	Pterocallis (Recticallis) nigrostriata	Korea	Gyeongsangnam-do, Namheae-gun	34˚50'15''N 127˚53'32''E	14.vii.2014	Betulaceae	Alnus firma	Yerim Lee & Hyoseok Lee
	12	37	36	Pte1-3	KY306991	140714YR13-Pte1-3	Panaphidini	Panaphidina	Pterocallis (Recticallis) nigrostriata	Korea	Gyeongsangnam-do, Namheae-gun	34˚50'15''N 127˚53'32''E	14.vii.2014	Betulaceae	Alnus firma	Yerim Lee & Hyoseok Lee
		102	98	L1	KY306992	110611YR69-L1	Panaphidini	Panaphidina	Sarucallis kahawaluokalani	Korea	Seoul, Dongdaemun-gu, Dapsimni-dong	37˚34'06''N 127˚02'58''E	11.vi.2011	Lythraceae	Lagerstroemia indica	Yerim Lee
		102	98	L2	KY306993	110611YR69-L2	Panaphidini	Panaphidina	Sarucallis kahawaluokalani	Korea	Seoul, Dongdaemun-gu, Dapsimni-dong	37˚34'06''N 127˚02'58''E	11.vi.2011	Lythraceae	Lagerstroemia indica	Yerim Lee
		103	99	L4	KY306994	130724YR3-L4	Panaphidini	Panaphidina	Sarucallis kahawaluokalani	Korea	Jeollanam-do, Gwangyang-si, Chusan-research forest	35˚01'56''N 127˚36'21''E	24.vii.2013	Lythraceae	Lagerstroemia indica	Yerim Lee
		107	99	L6	KY306995	130728YR32-L6	Panaphidini	Panaphidina	Sarucallis kahawaluokalani	Korea	Jeollanam-do, Suncheon-si, Byeolryang-myeon	34˚52'65''N 127˚27'06''E	28.vii.2013	Lythraceae	Lagerstroemia indica	Yerim Lee
		107	99	L8	KY306996	130814YR7-L8	Panaphidini	Panaphidina	Sarucallis kahawaluokalani	Korea	Gangwon-do, Gangreung-si, Chodang-dong	37˚47'30''N 128˚54'56''E	14.viii.2013	Lythraceae	Lagerstroemia indica	Yerim Lee
	40	99	95	Ce5	KY306997	140430YR2-Ce5	Panaphidini	Panaphidina	Shivaphis (Shivaphis) celti	Korea	Gyeonggi-do, Suwon-si, SNU-arboretum	37˚15'43''N 126˚58'58''E	30.iv.2014	Cannabaceae	Celtis sp.	Yerim Lee
	40	99	95	Ce6	KY306998	140510YR14-Ce6	Panaphidini	Panaphidina	Shivaphis (Shivaphis) celti	Korea	Chungcheongnam-do, Taean-gun, Cheonripo	36˚47'47''N 126˚09'04''E	10.v.2014	Cannabaceae	Celtis sp.	Yerim Lee & Hyoseok Lee
		129	114	Ce8	KY306999	140605YR1-Ce8	Panaphidini	Panaphidina	Shivaphis (Shivaphis) celti	Korea	Jeollanam-do, Yeosu-si, Mt. Cheonseongsan	35˚25'12''N 129˚06'43''E	5.vi.2014	Cannabaceae	Celtis sp.	Yerim Lee
		29	28	Shi4-2	KY307000	150604YR-Shi4-2	Panaphidini	Panaphidina	Shivaphis (Shinishivaphis) tilisucta	Korea	Chungcheongnam-do, Dangjin-gun	36˚53'37''N 126˚37'41''E	4.vi.2014	Ulmaceae	Ulmus sp.	Yerim Lee & Hyoseok Lee
		134	113	UCD7	KY307001	150722YR-UCD7	Panaphidini	Panaphidina	Shivaphis (Shivaphis) celti	USA	California, Davis, Shields Ave	38˚32'24''N 121˚45'00''E	22.vii.2015	Cannabaceae	Celtis sp.	Yerim Lee & Hyoseok Lee
	40	99	95	Ce7-1	KY307002	140624YR4-Ce7-1	Panaphidini	Panaphidina	Shivaphis (Sinishivaphis) szelegiewiczi	Korea	Gangwon-do, Yeongwol-gun, Jangreung	37˚11'47''N 128˚27'10''E	24.vi.2014	Cannabaceae	Celtis sp.	Yerim Lee
				Ce7-2	KY307003	140624YR4-Ce7-2	Panaphidini	Panaphidina	Shivaphis (Sinishivaphis) szelegiewiczi	Korea	Gangwon-do, Yeongwol-gun, Jangreung	37˚11'47''N 128˚27'10''E	24.vi.2014	Cannabaceae	Celtis sp.	Yerim Lee
		21	21	Ce7-3	KY307004	140624YR4-Ce7-3	Panaphidini	Panaphidina	Shivaphis (Sinishivaphis) szelegiewiczi	Korea	Gangwon-do, Yeongwol-gun, Jangreung	37˚11'47''N 128˚27'10''E	24.vi.2014	Cannabaceae	Celtis sp.	Yerim Lee
		21	21	Ce7-4	KY307005	140624YR4-Ce7-4	Panaphidini	Panaphidina	Shivaphis (Sinishivaphis) szelegiewiczi	Korea	Gangwon-do, Yeongwol-gun, Jangreung	37˚11'47''N 128˚27'10''E	24.vi.2014	Cannabaceae	Celtis sp.	Yerim Lee
		129	114	Ce7-5	KY307006	140624YR4-Ce7-5	Panaphidini	Panaphidina	Shivaphis (Sinishivaphis) szelegiewiczi	Korea	Gangwon-do, Yeongwol-gun, Jangreung	37˚11'47''N 128˚27'10''E	24.vi.2014	Cannabaceae	Celtis sp.	Yerim Lee
		129	114	Ce7-6	KY307007	140624YR4-Ce7-6	Panaphidini	Panaphidina	Shivaphis (Sinishivaphis) szelegiewiczi	Korea	Gangwon-do, Yeongwol-gun, Jangreung	37˚11'47''N 128˚27'10''E	24.vi.2014	Cannabaceae	Celtis sp.	Yerim Lee
	40	99	95	Ce11	KY307008	140430YR2-Ce11	Panaphidini	Panaphidina	Shivaphis (Shinishivaphis) tilisucta	Korea	Gyeonggi-do, Suwon-si, SNU-arboretum	37˚15'43''N 126˚58'58''E	30.iv.2014	Cannabaceae	Celtis sp.	Yerim Lee
		129	114	Shi1	KY307009	140430YR22-Shi1	Panaphidini	Panaphidina	Shivaphis (Shinishivaphis) tilisucta	Korea	Gyeonggi-do, Suwon-si, SNU-arboretum	37˚15'43''N 126˚58'58''E	30.iv.2014	Cannabaceae	Celtis sp.	Yerim Lee
8	46	114	104	Shi2	KY307010	150503YR16-Shi2	Panaphidini	Panaphidina	Shivaphis (Shinishivaphis) tilisucta	Korea	Gyeongsangnam-do, Goseong-gun, Maam-myeon	35˚02'48''N 128˚24'44''E	3.v.2015	Cannabaceae	Celtis choseniana	Yerim Lee & Hyoseok Lee
		29	28	Shi4-1	KY307011	150604YR-Shi4-1	Panaphidini	Panaphidina	Shivaphis (Shinishivaphis) tilisucta	Korea	Chungcheongnam-do, Dangjin-gun	36˚53'37''N 126˚37'41''E	4.vi.2014	Ulmaceae	Ulmus sp.	Yerim Lee & Hyoseok Lee
	8	25	25	Ce10-1	KY307012	040608HJ59-Ce10-1	Panaphidini	Panaphidina	Shivaphis sp.	Korea	Gyeongsangbuk-do, Ulreung-Island, Ulreung-gun, Jeodong-ri	37˚29'58''N 130˚53'00''E	8.vi.2004	Cannabaceae	Celtis sp.	Hyojoong Kim
		98	94	Ce10-2	KY307013	040608HJ59-Ce10-2	Panaphidini	Panaphidina	Shivaphis sp.	Korea	Gyeongsangbuk-do, Ulreung-Island, Ulreung-gun, Jeodong-ri	37˚29'58''N 130˚53'00''E	8.vi.2004	Cannabaceae	Celtis sp.	Hyojoong Kim
		18	18	B74	KY307014	140630YR8-B74	Calaphidini	Calaphidina	Symydobius kabae	Korea	Gyeonggi-do, Icheon-si, Deokpyeong-service area	37˚14'28''N 127˚23'24''E	30.vi.2014	Betulaceae	Betula sp.	Yerim Lee
		18	18	B79	KY307015	100815SH46-B79	Calaphidini	Calaphidina	Symydobius kabae	China	Harbin-province	45˚44'46''N 126˚39'10''E	15.viii.2010	Betulaceae	Betula sp.	Seunghwan Lee
	10	30	29	Sym1	KY307016	100815SH46-Sym1	Calaphidini	Calaphidina	Symydobius kabae	China	Harbin-province	45˚44'46''N 126˚39'10''E	15.x.2010	Betulaceae	Betula sp.	Seunghwan Lee
		133	112	UK7-1	KY307017	150902MK-UK7-1	Calaphidini	Calaphidina	Symydobius sp.	UK	London, Rhichmond	51˚27'40''N 0˚18'13''E	2.ix.2015	Betulaceae	Betula sechuanica	Mariusz Kanturski
		122	110	UK7-2	KY307018	150902MK-UK7-2	Calaphidini	Calaphidina	Symydobius sp.	UK	London, Rhichmond	51˚27'40''N 0˚18'13''E	2.ix.2015	Betulaceae	Betula sechuanica	Mariusz Kanturski
		122	110	UK7-3	KY307019	150902MK-UK7-3	Calaphidini	Calaphidina	Symydobius sp.	UK	London, Rhichmond	51˚27'40''N 0˚18'13''E	2.ix.2015	Betulaceae	Betula sechuanica	Mariusz Kanturski
		133	112	UK7-4	KY307020	150902MK-UK7-4	Calaphidini	Calaphidina	Symydobius sp.	UK	London, Rhichmond	51˚27'40''N 0˚18'13''E	2.ix.2015	Betulaceae	Betula sechuanica	Mariusz Kanturski
		122	110	UK7-5	KY307021	150902MK-UK7-5	Calaphidini	Calaphidina	Symydobius sp.	UK	London, Rhichmond	51˚27'40''N 0˚18'13''E	2.ix.2015	Betulaceae	Betula sechuanica	Mariusz Kanturski
9	47	117	105	CZ9-1	KY307022	010511SH45-CZ9-1	Panaphidini	Panaphidina	Takecallis arundicolens	Czech Republic	Praha	50˚04'31''N 14˚26'16''E	11.v.2001	Poaceae	Sasa sp.	Seunghwan Lee
9	47	117	105	CZ9-2	KY307023	010511SH45-CZ9-2	Panaphidini	Panaphidina	Takecallis arundicolens	Czech Republic	Praha	50˚04'31''N 14˚26'16''E	11.v.2001	Poaceae	Sasa sp.	Seunghwan Lee
9	47	117	105	CZ9-3	KY307024	010511SH45-CZ9-3	Panaphidini	Panaphidina	Takecallis arundicolens	Czech Republic	Praha	50˚04'31''N 14˚26'16''E	11.v.2001	Poaceae	Sasa sp.	Seunghwan Lee
9	47	117	105	CZ9-4	KY307025	010511SH45-CZ9-4	Panaphidini	Panaphidina	Takecallis arundicolens	Czech Republic	Praha	50˚04'31''N 14˚26'16''E	11.v.2001	Poaceae	Sasa sp.	Seunghwan Lee
		106	98	CZ9-5	KY307026	010511SH45-CZ9-5	Panaphidini	Panaphidina	Takecallis arundicolens	Czech Republic	Praha	50˚04'31''N 14˚26'16''E	11.v.2001	Poaceae	Sasa sp.	Seunghwan Lee
		33	32	S1	KY307027	030625SH062-S1	Panaphidini	Panaphidina	Takecallis arundicolens	Korea	Gangwon-do, Yangyang-gun, Ganghyeon-myeon, Naksan-temple	38˚07'28''N 128˚37'40''E	25.vi.2003	Poaceae	Sasa sp.	Seunghwan Lee
		33	32	S12-1	KY307028	131018JG2-S12-1	Panaphidini	Panaphidina	Takecallis arundicolens	Korea	Jeollabuk-do, Jeongeup-si, Bokheung-myeonm, near by Mt. Naejangsan	35˚27'47''N 126˚53'43''E	18.x.2013	Poaceae	Sasa sp.	Jong-kook jung
		33	32	S12-2	KY307029	131018JG2-S12-2	Panaphidini	Panaphidina	Takecallis arundicolens	Korea	Jeollabuk-do, Jeongeup-si, Bokheung-myeonm, near by Mt. Naejangsan	35˚27'47''N 126˚53'43''E	18.x.2013	Poaceae	Sasa sp.	Jong-kook jung
		33	32	S12-3	KY307030	131018JG2-S12-3	Panaphidini	Panaphidina	Takecallis arundicolens	Korea	Jeollabuk-do, Jeongeup-si, Bokheung-myeonm, near by Mt. Naejangsan	35˚27'47''N 126˚53'43''E	18.x.2013	Poaceae	Sasa sp.	Jong-kook jung
		28	27	S12-4	KY307031	131018JG2-S12-4	Panaphidini	Panaphidina	Takecallis arundicolens	Korea	Jeollabuk-do, Jeongeup-si, Bokheung-myeonm, near by Mt. Naejangsan	35˚27'47''N 126˚53'43''E	18.x.2013	Poaceae	Sasa sp.	Jong-kook jung
		28	27	S13	KY307032	131018JG2-S13	Panaphidini	Panaphidina	Takecallis arundicolens	Korea	Jeollabuk-do, Jeongeup-si, Bokheung-myeonm, near by Mt. Naejangsan	35˚27'47''N 126˚53'43''E	18.x.2013	Poaceae	Sasa sp.	Jong-kook jung
		33	32	S14	KY307033	140510YR11-S14	Panaphidini	Panaphidina	Takecallis arundicolens	Korea	Chungcheongnam-do, Taean-gun, Cheonripo	36˚47'47''N 126˚09'04''E	10.v.2014	Poaceae	Sasa sp.	Yerim Lee & Hyoseok Lee
		31	30	S15-1	KY307034	140801YR7-S15-1	Panaphidini	Panaphidina	Takecallis arundicolens	Korea	Jeju-Island, Jeju-si, near by Seongpanak	33˚24'02''N 126˚37'06''E	1.viii.2014	Poaceae	Sasa quelpaertensis	Yerim Lee
				S15-2	KY307035	140801YR7-S15-2	Panaphidini	Panaphidina	Takecallis arundicolens	Korea	Jeju-Island, Jeju-si, near by Seongpanak	33˚24'02''N 126˚37'06''E	1.viii.2014	Poaceae	Sasa quelpaertensis	Yerim Lee
				S15-3	KY307036	140801YR7-S15-3	Panaphidini	Panaphidina	Takecallis arundicolens	Korea	Jeju-Island, Jeju-si, near by Seongpanak	33˚24'02''N 126˚37'06''E	1.viii.2014	Poaceae	Sasa quelpaertensis	Yerim Lee
12		128	114	S15-4	KY307037	140801YR7-S15-4	Panaphidini	Panaphidina	Takecallis arundicolens	Korea	Jeju-Island, Jeju-si, near by Seongpanak	33˚24'02''N 126˚37'06''E	1.viii.2014	Poaceae	Sasa quelpaertensis	Yerim Lee
		33	32	S15-n1	KY307038	140801YR7-S15-n1	Panaphidini	Panaphidina	Takecallis arundicolens	Korea	Jeju-Island, Jeju-si, near by Seongpanak	33˚24'02''N 126˚37'06''E	1.viii.2014	Poaceae	Sasa quelpaertensis	Yerim Lee
		28	27	S15-n2	KY307039	140801YR7-S15-n2	Panaphidini	Panaphidina	Takecallis arundicolens	Korea	Jeju-Island, Jeju-si, near by Seongpanak	33˚24'02''N 126˚37'06''E	1.viii.2014	Poaceae	Sasa quelpaertensis	Yerim Lee
		116	105	S2	KY307040	030625SH062-S2	Panaphidini	Panaphidina	Takecallis arundicolens	Korea	Gangwon-do, Yangyang-gun, Ganghyeon-myeon, Naksan-temple	38˚07'28''N 128˚37'40''E	25.vi.2003	Poaceae	Sasa sp.	Seunghwan Lee
		116	105	S4	KY307041	060407SH16-S4	Panaphidini	Panaphidina	Takecallis arundicolens	Korea	Gyeongsangnam-do, Namhae-gun	34˚50'15''N 127˚53'32''E	7.iv.2006	Poaceae	Sasa sp.	Seunghwan Lee
	1	2	2	S5	KY307042	060427SH55-S5	Panaphidini	Panaphidina	Takecallis arundicolens	Korea	Jeju-Island, Seoguipo-si, Seobjikoji Beach	33˚25'24''N 126˚55'45''E	7.iv.2006	Poaceae	Sasa sp.	Seunghwan Lee
		33	32	S6	KY307043	060511HJ1-S6	Panaphidini	Panaphidina	Takecallis arundicolens	Korea	Gyeongsangnam-do, Tongyeong-si, Donam-dong	34˚49'36''N 128˚25'36''E	11.v.2006	Poaceae	Sasa sp.	Hyojoong Kim
		33	32	S7-1	KY307044	111018YR1-S7-1	Panaphidini	Panaphidina	Takecallis arundicolens	Korea	Seoul, Ewha Womans University	37˚33'42''N 126˚56'48''E	18.x.2011	Poaceae	Sasa sp.	Yerim Lee
	38	96	92	S7-2	KY307045	111018YR1-S7-2	Panaphidini	Panaphidina	Takecallis arundicolens	Korea	Seoul, Ewha Womans University	37˚33'42''N 126˚56'48''E	18.x.2011	Poaceae	Sasa sp.	Yerim Lee
	38	96	92	S7-3	KY307046	111018YR1-S7-3	Panaphidini	Panaphidina	Takecallis arundicolens	Korea	Seoul, Ewha Womans University	37˚33'42''N 126˚56'48''E	18.x.2011	Poaceae	Sasa sp.	Yerim Lee
	38	96	92	S7-4	KY307047	111018YR1-S7-4	Panaphidini	Panaphidina	Takecallis arundicolens	Korea	Seoul, Ewha Womans University	37˚33'42''N 126˚56'48''E	18.x.2011	Poaceae	Sasa sp.	Yerim Lee
		95	91	S7-5	KY307048	111018YR1-S7-5	Panaphidini	Panaphidina	Takecallis arundicolens	Korea	Seoul, Ewha Womans University	37˚33'42''N 126˚56'48''E	18.x.2011	Poaceae	Sasa sp.	Yerim Lee
		95	91	S8-2	KY307049	130505YR1-S8-2	Panaphidini	Panaphidina	Takecallis arundicolens	Korea	Seoul, Yangjae-station	37˚29'04''N 127˚02'02''E	5.v.2013	Poaceae	Sasa sp.	Yerim Lee & Hyoseok Lee
	10	30	29	S8-3	KY307050	130505YR1-S8-3	Panaphidini	Panaphidina	Takecallis arundicolens	Korea	Seoul, Yangjae-station	37˚29'04''N 127˚02'02''E	5.v.2013	Poaceae	Sasa sp.	Yerim Lee & Hyoseok Lee
	10	30	29	S8-4	KY307051	130505YR1-S8-4	Panaphidini	Panaphidina	Takecallis arundicolens	Korea	Seoul, Yangjae-station	37˚29'04''N 127˚02'02''E	5.v.2013	Poaceae	Sasa sp.	Yerim Lee & Hyoseok Lee
	14	39	38	Take1-1	KY307052	140716YR-Take1-1	Panaphidini	Panaphidina	Takecallis arundicolens	Korea	Jeollanam-do, Yeosu-si, Odong-Island	34˚44'51''N 127˚45'52''E	16.vii.2014	Poaceae	Pseudosasa japonica	Yerim Lee & Hyoseok Lee
	14	39	38	Take1-2	KY307053	140716YR-Take1-2	Panaphidini	Panaphidina	Takecallis arundicolens	Korea	Jeollanam-do, Yeosu-si, Odong-Island	34˚44'51''N 127˚45'52''E	16.vii.2014	Poaceae	Pseudosasa japonica	Yerim Lee & Hyoseok Lee
	2	3	3	S17	KY307054	140510YR17-S17	Panaphidini	Panaphidina	Takecallis arundinariae	Korea	Chungcheongnam-do, Taean-gun	36˚44'44''N 126˚17'52''E	10.v.2014	Poaceae	Sasa sp.	Yerim Lee & Hyoseok Lee
	2	3	3	S18	KY307055	140510YR17-S18	Panaphidini	Panaphidina	Takecallis arundinariae	Korea	Chungcheongnam-do, Taean-gun	36˚44'44''N 126˚17'52''E	10.v.2014	Poaceae	Sasa sp.	Yerim Lee & Hyoseok Lee
		107	99	JA107-1	KY307056	050910-JA107-1	Panaphidini	Panaphidina	Takecallis sasae	Japan	Hokkaido, Iwamizawa	43˚12'14''N 141˚45'34''E	10.ix.2005	Poaceae	Sasa palmata	unknown
		116	105	JA107-2	KY307057	050910-JA107-2	Panaphidini	Panaphidina	Takecallis sasae	Japan	Hokkaido, Iwamizawa	43˚12'14''N 141˚45'34''E	10.ix.2005	Poaceae	Sasa palmata	unknown
9	47	117	105	JA118-1	KY307058	090816-JA118-1	Panaphidini	Panaphidina	Takecallis sasae	Japan	Hokkaido, Ebetsu	43˚06'13''N 141˚32'10''E	16..viii.2009	Poaceae	Sasa sp.	unknown
9	47	117	105	JA118-2	KY307059	090816-JA118-2	Panaphidini	Panaphidina	Takecallis sasae	Japan	Hokkaido, Ebetsu	43˚06'13''N 141˚32'10''E	16..viii.2010	Poaceae	Sasa sp.	unknown
7	45	108	99	JP3-1	KY307060	050910-JP3-1	Panaphidini	Panaphidina	Takecallis sasae	Japan	Hokkaido, Iwamizawa	43˚12'14''N 141˚45'34''E	10.ix.2005	Poaceae	Sasa palmata	unknown
		107	99	JP3-2	KY307061	050910-JP3-2	Panaphidini	Panaphidina	Takecallis sasae	Japan	Hokkaido, Iwamizawa	43˚12'14''N 141˚45'34''E	10.ix.2005	Poaceae	Sasa palmata	unknown
		125	111	JP3-3	KY307062	050910-JP3-3	Panaphidini	Panaphidina	Takecallis sasae	Japan	Hokkaido, Iwamizawa	43˚12'14''N 141˚45'34''E	10.ix.2005	Poaceae	Sasa palmata	unknown
		106	98	JP4	KY307063	050912-JP4	Panaphidini	Panaphidina	Takecallis sasae	Japan	Hokkaido, Iwamizawa	43˚12'14''N 141˚45'34''E	10.ix.2005	Poaceae	Sasa palmata	unknown
		33	32	S11	KY307064	130829YR11-S11	Panaphidini	Panaphidina	Takecallis sp.	Korea	Gangwon-do, Pyeongchang-gun, Chahang-ri, Mt. Hwangbyeongsan	37˚42'27''N 128˚41'14''E	29.viii.2013	Poaceae	Sasa sp.	Yerim Lee
		28	27	S16-1	KY307065	140630YR2-S16-1	Panaphidini	Panaphidina	Takecallis sp.	Korea	Jeollabuk-do, Muju-gun, Deokyusan-Recreational forest	35˚54'23''N 127˚48'51''E	30.vi.2014	Poaceae	Sasa sp.	Yerim Lee
	1	2	2	S16-2	KY307066	140630YR2-S16-2	Panaphidini	Panaphidina	Takecallis sp.	Korea	Jeollabuk-do, Muju-gun, Deokyusan-Recreational forest	35˚54'23''N 127˚48'51''E	30.vi.2014	Poaceae	Sasa sp.	Yerim Lee
		1	1	S16-3	KY307067	140630YR2-S16-3	Panaphidini	Panaphidina	Takecallis sp.	Korea	Jeollabuk-do, Muju-gun, Deokyusan-Recreational forest	35˚54'23''N 127˚48'51''E	30.vi.2014	Poaceae	Sasa sp.	Yerim Lee
		7	7	S16-4	KY307068	140630YR2-S16-4	Panaphidini	Panaphidina	Takecallis sp.	Korea	Jeollabuk-do, Muju-gun, Deokyusan-Recreational forest	35˚54'23''N 127˚48'51''E	30.vi.2014	Poaceae	Sasa sp.	Yerim Lee
	1	2	2	S16-5	KY307069	140630YR2-S16-5	Panaphidini	Panaphidina	Takecallis sp.	Korea	Jeollabuk-do, Muju-gun, Deokyusan-Recreational forest	35˚54'23''N 127˚48'51''E	30.vi.2014	Poaceae	Sasa sp.	Yerim Lee
		116	105	S3	KY307070	050518SH38-S3	Panaphidini	Panaphidina	Takecallis sp.	Korea	Gyeongsangnam-do, Munkyeong-si, Munkyeong-eup	36˚47'11''N 128˚09'29''E	18.v.2005	Poaceae	Sasa sp.	Seunghwan Lee
		31	30	S9	KY307071	130815YR12-S9	Panaphidini	Panaphidina	Takecallis sp.	Korea	Gangwon-do, Pyeongchang-gun, Chahang-ri, Mt. Hwangbyeongsan	37˚42'27''N 128˚41'14''E	15.viii.2013	Poaceae	Sasa sp.	Yerim Lee
		110	101	Tr1	KY307072	140827YR1-Tr1	Panaphidini	Panaphidina	Therioaphis (Pterocallidium) trifolii	Korea	Seoul, Gwanak-gu, Seoul National University	37˚27'35''N 126˚57'06''E	27.viii.2014	Fabaceae	trifolium repens	Yerim Lee & Hyoseok Lee
		110	101	Tr2	KY307073	140827YR1-Tr2	Panaphidini	Panaphidina	Therioaphis (Pterocallidium) trifolii	Korea	Seoul, Gwanak-gu, Seoul National University	37˚27'35''N 126˚57'06''E	27.viii.2014	Fabaceae	trifolium repens	Yerim Lee & Hyoseok Lee
		110	101	Tr3	KY307074	140827YR1-Tr3	Panaphidini	Panaphidina	Therioaphis (Pterocallidium) trifolii	Korea	Seoul, Gwanak-gu, Seoul National University	37˚27'35''N 126˚57'06''E	27.viii.2014	Fabaceae	trifolium repens	Yerim Lee & Hyoseok Lee
		106	98	CZ4	KY307075	040722SH4-CZ4	Panaphidini	Panaphidina	Therioaphis (Therioaphis) tenera	Czech Republic	Praha	50˚04'31''N 14˚26'16''E	22.vii.2004	unknown	unknown	Seunghwan Lee
	10	30	29	T13	KY307076	130815YR9-T13	Panaphidini	Panaphidina	Tiliaphis coreana	Korea	Gangwon-do, Pyeongchang-gun, Byeongnae-ri, Mt. Hwangbyeongsan	37˚42'27''N 128˚41'14''E	15.viii.2013	Tiliaceae	Tilia sp.	Yerim Lee
		31	30	T16	KY307077	140612YR20-T16	Panaphidini	Panaphidina	Tiliaphis coreana	Korea	Gangwon-do, Yeongwol-gun, Sangdong-ri	37˚47'09''N 127˚17'58''E	12.vi.2014	Tiliaceae	Tilia sp.	Yerim Lee
	10	30	29	T10	KY307078	090911HR10-T10	Panaphidini	Panaphidina	Tiliaphis pseudoshinae	Korea	Gyeonggi-do, Osan-si, Sucheong-dong	37˚09'56''N 127˚03'52''E	9.ix.2009	Tiliaceae	Tilia sp.	Hwalran Choi
	48	120	108	T6-3	KY307079	100815SH1-T6-3	Panaphidini	Panaphidina	Tiliaphis pseudoshinae	China	Harbin-province, Northeast forestry University	45˚43'26''N 126˚38'25''E	15.viii.2010	Tiliaceae	Tilia sp.	Seunghwan Lee
8		113	100	T6-4	KY307080	100815SH1-T6-4	Panaphidini	Panaphidina	Tiliaphis pseudoshinae	China	Harbin-province, Northeast forestry University	45˚43'26''N 126˚38'25''E	15.viii.2010	Tiliaceae	Tilia sp.	Seunghwan Lee
8		113	100	T6-5	KY307081	100815SH1-T6-5	Panaphidini	Panaphidina	Tiliaphis pseudoshinae	China	Harbin-province, Northeast forestry University	45˚43'26''N 126˚38'25''E	15.viii.2010	Tiliaceae	Tilia sp.	Seunghwan Lee
8		113	100	T7	KY307082	100815SH1-T7	Panaphidini	Panaphidina	Tiliaphis pseudoshinae	China	Harbin-province, Northeast forestry University	45˚43'26''N 126˚38'25''E	15.viii.2010	Tiliaceae	Tilia sp.	Seunghwan Lee
		111	102	T9-1	KY307083	090911HR9-T9-1	Panaphidini	Panaphidina	Tiliaphis pseudoshinae	Korea	Gyeonggi-do, Osan-si, Sucheong-dong	37˚09'56''N 127˚03'52''E	9.ix.2009	Tiliaceae	Tilia sp.	Hwalran Choi
		33	32	T5-1	KY307084	030617HJ2-T5-1	Panaphidini	Panaphidina	Tiliaphis shinae	Korea	Gyeonggi-do, Suwon-si, Gwonseon-gu	37˚15'25''N 126˚58'19''E	17.vi.2003	Tiliaceae	Tilia sp.	Hyojoong Kim
		112	103	T6-1	KY307085	100815SH1-T6-1	Panaphidini	Panaphidina	Tiliaphis shinae	China	Harbin-province, Northeast forestry University	45˚43'26''N 126˚38'25''E	15.viii.2010	Tiliaceae	Tilia sp.	Seunghwan Lee
	14	39	38	T9-2	KY307086	090911HR9-T9-2	Panaphidini	Panaphidina	Tiliaphis shinae	Korea	Gyeonggi-do, Osan-si, Sucheong-dong	37˚09'56''N 127˚03'52''E	9.ix.2009	Tiliaceae	Tilia sp.	Hwalran Choi
	10	30	29	T11	KY307087	130725YR12-T11	Panaphidini	Panaphidina	Tiliaphis shinjii	Korea	Jeollanam-do, Gwangyang-si, Chusan-research forest	35˚01'56''N 127˚36'21''E	25.vii.2013	Tiliaceae	Tilia sp.	Yerim Lee
		31	30	T15	KY307088	140621YR1-T15	Panaphidini	Panaphidina	Tiliaphis shinjii	Korea	Gyeonggi-do, Incheon-si, Ganghwa-Island, Mt. Manisan	37˚36'41''N 126˚26'05''E	21.vi.2014	Tiliaceae	Tilia sp.	Yerim Lee & Hyoseok Lee
		33	32	T2	KY307089	030617HJ2-T2	Panaphidini	Panaphidina	Tiliaphis shinjii	Korea	Gyeonggi-do, Suwon-si, Gwonseon-gu	37˚15'25''N 126˚58'19''E	17.vi.2003	Tiliaceae	Tilia sp.	Hyojoong Kim
		33	32	T5-2	KY307090	030617HJ2-T5-2	Panaphidini	Panaphidina	Tiliaphis shinjii	Korea	Gyeonggi-do, Suwon-si, Gwonseon-gu	37˚15'25''N 126˚58'19''E	17.vi.2003	Tiliaceae	Tilia sp.	Hyojoong Kim
7	45	108	99	T5-3	KY307091	030617HJ2-T5-3	Panaphidini	Panaphidina	Tiliaphis shinjii	Korea	Gyeonggi-do, Suwon-si, Gwonseon-gu	37˚15'25''N 126˚58'19''E	17.vi.2003	Tiliaceae	Tilia sp.	Hyojoong Kim
		111	102	T5-4	KY307092	030617HJ2-T5-4	Panaphidini	Panaphidina	Tiliaphis shinjii	Korea	Gyeonggi-do, Suwon-si, Gwonseon-gu	37˚15'25''N 126˚58'19''E	17.vi.2003	Tiliaceae	Tilia sp.	Hyojoong Kim
		112	103	T6-2	KY307093	100815SH1-T6-2	Panaphidini	Panaphidina	Tiliaphis shinjii	China	Harbin-province, Northeast forestry University	45˚43'26''N 126˚38'25''E	15.viii.2010	Tiliaceae	Tilia sp.	Seunghwan Lee
		110	101	T8	KY307094	100815SH61-T8	Panaphidini	Panaphidina	Tiliaphis shinjii	China	Harbin-province, Northeast forestry University	45˚43'26''N 126˚38'25''E	15.viii.2010	Tiliaceae	Tilia sp.	Seunghwan Lee
		129	114	Ch1	KY307095	131222Lao21-Ch1	Panaphidini	Panaphidina	Tinocallis (Orientinocallis) himalayensis	Laos	Laos, Vientiane	17˚58'32''N 102˚37'59''E	22.xii.2013	Lythraceae	Lgerstroemia speciosa	Yerim Lee
		129	114	Ch2	KY307096	131222Lao65-Ch2	Panaphidini	Panaphidina	Tinocallis (Orientinocallis) himalayensis	Laos	Laos, Banna-forest village	18˚07'42''N 102˚37'52''E	23.xii.2013	Lythraceae	Lgerstroemia speciosa	Yerim Lee
		102	98	JS8	KY307097	141115YR1-JS8	Panaphidini	Panaphidina	Tinocallis (Sappocallis) saltans	USA	California, Los Angeles, Corralitas Dr	34˚05'57''N 118˚15'09''E	15.xi.2014	Ulmaceae	Ulmus sp.	Yerim Lee
7	45	108	99	Tino1	KY307098	030515SH1-Tino1	Panaphidini	Panaphidina	Tinocallis (Sappocallis) saltans	Korea	Gyeonggi-do, Suwon-si, Gwonseon-gu	37˚15'25''N 126˚58'19''E	15.v.2003	Ulmaceae	Ulmus sp.	Seunghwan Lee
		115	104	U18	KY307099	0900622SH153-U18	Panaphidini	Panaphidina	Tinocallis (Sappocallis) saltans	China	Jilin-province, Yanbian	42˚54'33''N 129˚28'18''E	22.vi.2009	Ulmaceae	Ulmus sp.	Seunghwan Lee
8	46	114	104	U8	KY307100	140714YR20-U8	Panaphidini	Panaphidina	Tinocallis (Sappocallis) takachihoensis	Korea	Gyeongsangnam-do, Tongyeong-gun	34˚51'15''N 128˚25'59''E	14.vii.2014	Ulmaceae	Ulmus sp.	Yerim Lee & Hyoseok Lee
		31	30	U9	KY307101	140612YR15-U9	Panaphidini	Panaphidina	Tinocallis (Sappocallis) takachihoensis	Korea	Gangwon-do, Yeongwol-gun, Sangdong-ri	37˚47'09''N 127˚17'58''E	12.vi.2014	Ulmaceae	Ulmus sp.	Yerim Lee
		119	107	U16-1	KY307102	140530YR2-U16-1	Panaphidini	Panaphidina	Tinocallis (Sappocallis) ulmicola	Korea	Gyeonggi-do, Suwon-si, Gwonseon-gu	37˚15'25''N 126˚58'19''E	30.v.2015	Ulmaceae	Ulmus sp.	Yerim Lee
	48	120	108	U16-2	KY307103	140530YR2-U16-2	Panaphidini	Panaphidina	Tinocallis (Sappocallis) ulmicola	Korea	Gyeonggi-do, Suwon-si, Gwonseon-gu	37˚15'25''N 126˚58'19''E	30.v.2015	Ulmaceae	Ulmus sp.	Yerim Lee
		31	30	UC1-1	KY307104	140526YR7-UC1-1	Panaphidini	Panaphidina	Tinocallis (Sappocallis) ulmicola	Korea	Gyeonggi-do, Gapyeong-gun, Mt. Hwayasan	37˚40'17''N 127˚25'40''E	26.v.2014	Ulmaceae	Ulmus sp.	Yerim Lee
12		128	114	UC1-2	KY307105	140526YR7-UC1-2	Panaphidini	Panaphidina	Tinocallis (Sappocallis) ulmicola	Korea	Gyeonggi-do, Gapyeong-gun, Mt. Hwayasan	37˚40'17''N 127˚25'40''E	26.v.2014	Ulmaceae	Ulmus sp.	Yerim Lee
7	45	108	99	Tino2-1	KY307106	150612YR-Tino2-1	Panaphidini	Panaphidina	Tinocallis (Tinocallis) mushensis	Korea	Gyeonggi-do, Yangpyeong-gun	37˚29'28''N 127˚29'15''E	12.vi.2015	Ulmaceae	Zelkova serrata	Yerim Lee
7	45	108	99	Tino2-2	KY307107	150612YR-Tino2-2	Panaphidini	Panaphidina	Tinocallis (Tinocallis) mushensis	Korea	Gyeonggi-do, Yangpyeong-gun	37˚29'28''N 127˚29'15''E	12.vi.2015	Ulmaceae	Zelkova serrata	Yerim Lee
		127	113	Z10	KY307108	130905YR2-Z10	Panaphidini	Panaphidina	Tinocallis (Tinocallis) mushensis	Korea	Seoul, Gwanak-gu, Seoul National University	37˚27'35''N 126˚57'06''E	5.ix.2013	Ulmaceae	Zelkova serrata	Yerim Lee & Hyoseok Lee
11		124	111	Z16	KY307109	140607YR3-Z16	Panaphidini	Panaphidina	Tinocallis (Tinocallis) mushensis	Korea	Gyeonggi-do, Suwon-si, SNU-arboretum	37˚15'43''N 126˚58'58''E	7.vi.2014	Ulmaceae	Zelkova serrata	Yerim Lee
		133	112	Z7	KY307110	130728YR36-Z7	Panaphidini	Panaphidina	Tinocallis (Tinocallis) mushensis	Korea	Gongju-si, Jeongan-service area	36˚34'10''N 127˚06'54''E	28.vii.2013	Ulmaceae	Zelkova serrata	Yerim Lee
		119	107	U10-1	KY307111	140714YR19-U10-1	Panaphidini	Panaphidina	Tinocallis (Tinocallis) ulmiparvifoliae	Korea	Gyeongsangnam-do, Tongyeong-gun	34˚51'15''N 128˚25'59''E	14.vii.2014	Ulmaceae	Ulmus sp.	Yerim Lee & Hyoseok Lee
	48	120	108	U10-2	KY307112	140714YR19-U10-2	Panaphidini	Panaphidina	Tinocallis (Tinocallis) ulmiparvifoliae	Korea	Gyeongsangnam-do, Tongyeong-gun	34˚51'15''N 128˚25'59''E	14.vii.2014	Ulmaceae	Ulmus sp.	Yerim Lee & Hyoseok Lee
		116	105	U11	KY307113	140614YR3-U11	Panaphidini	Panaphidina	Tinocallis (Tinocallis) ulmiparvifoliae	Korea	Seoul, Jongno-gu, Gyeongbok-palace station	37˚34'33''N 126˚58'24''E	14.vi.2014	Ulmaceae	Ulmus sp.	Yerim Lee & Hyoseok Lee
		133	112	Z12	KY307114	141103YR1-Z12	Panaphidini	Panaphidina	Tinocallis (Tinocallis) viridis	Korea	Seoul, Guro-gu, Guro-digital station	37˚29'06''N 126˚54'05''E	3.xi.2014	Ulmaceae	Zelkova serrata	Yerim Lee & Hyoseok Lee
		133	112	Z13	KY307115	141103YR1-Z13	Panaphidini	Panaphidina	Tinocallis (Tinocallis) viridis	Korea	Seoul, Guro-gu, Guro-digital station	37˚29'06''N 126˚54'05''E	3.xi.2014	Ulmaceae	Zelkova serrata	Yerim Lee & Hyoseok Lee
		109	100	Tino3-1	KY307116	140510YR3-Tino3-1	Panaphidini	Panaphidina	Tinocallis (Tinocallis) zelkowae	Korea	Chungcheongnam-do, Cheongyang-gun, Mt. Chilgapsan	36˚24'48''N 126˚53'03''E	10.v.2014	Ulmaceae	Zelkova serrata (var. latifoliae)	Yerim Lee & Hyoseok Lee
		109	100	Tino3-2	KY307117	140510YR3-Tino3-2	Panaphidini	Panaphidina	Tinocallis (Tinocallis) zelkowae	Korea	Chungcheongnam-do, Cheongyang-gun, Mt. Chilgapsan	36˚24'48''N 126˚53'03''E	10.v.2014	Ulmaceae	Zelkova serrata (var. latifoliae)	Yerim Lee & Hyoseok Lee
		109	100	Tino3-3	KY307118	140510YR3-Tino3-3	Panaphidini	Panaphidina	Tinocallis (Tinocallis) zelkowae	Korea	Chungcheongnam-do, Cheongyang-gun, Mt. Chilgapsan	36˚24'48''N 126˚53'03''E	10.v.2014	Ulmaceae	Zelkova serrata (var. latifoliae)	Yerim Lee & Hyoseok Lee
7	45	108	99	Tino3-4	KY307119	140510YR3-Tino3-4	Panaphidini	Panaphidina	Tinocallis (Tinocallis) zelkowae	Korea	Chungcheongnam-do, Cheongyang-gun, Mt. Chilgapsan	36˚24'48''N 126˚53'03''E	10.v.2014	Ulmaceae	Zelkova serrata (var. latifoliae)	Yerim Lee & Hyoseok Lee
7	45	108	99	Tino3-n1	KY307120	140510YR3-Tino3-n1	Panaphidini	Panaphidina	Tinocallis (Tinocallis) zelkowae	Korea	Chungcheongnam-do, Cheongyang-gun, Mt. Chilgapsan	36˚24'48''N 126˚53'03''E	10.v.2014	Ulmaceae	Zelkova serrata (var. latifoliae)	Yerim Lee & Hyoseok Lee
7	45	108	99	Tino3-n2	KY307121	140510YR3-Tino3-n2	Panaphidini	Panaphidina	Tinocallis (Tinocallis) zelkowae	Korea	Chungcheongnam-do, Cheongyang-gun, Mt. Chilgapsan	36˚24'48''N 126˚53'03''E	10.v.2014	Ulmaceae	Zelkova serrata (var. latifoliae)	Yerim Lee & Hyoseok Lee
7	45	108	99	Tino3-n3	KY307122	140510YR3-Tino3-n3	Panaphidini	Panaphidina	Tinocallis (Tinocallis) zelkowae	Korea	Chungcheongnam-do, Cheongyang-gun, Mt. Chilgapsan	36˚24'48''N 126˚53'03''E	10.v.2014	Ulmaceae	Zelkova serrata (var. latifoliae)	Yerim Lee & Hyoseok Lee
7	45	108	99	Tino4-1	KY307123	140624YR2-Tino4-1	Panaphidini	Panaphidina	Tinocallis (Tinocallis) zelkowae	Korea	Gangwon-do, Yeongwol-gun	37˚11'01''N 128˚27'42''E	24.vi.2014	Ulmaceae	Zelkova serrata (var. latifoliae)	Yerim Lee
	48	120	108	Tino4-2	KY307124	140624YR2-Tino4-2	Panaphidini	Panaphidina	Tinocallis (Tinocallis) zelkowae	Korea	Gangwon-do, Yeongwol-gun	37˚11'01''N 128˚27'42''E	24.vi.2014	Ulmaceae	Zelkova serrata (var. latifoliae)	Yerim Lee
8		113	100	Tino4-3	KY307125	140624YR2-Tino4-3	Panaphidini	Panaphidina	Tinocallis (Tinocallis) zelkowae	Korea	Gangwon-do, Yeongwol-gun	37˚11'01''N 128˚27'42''E	24.vi.2014	Ulmaceae	Zelkova serrata (var. latifoliae)	Yerim Lee
8		113	100	Tino5-1	KY307126	140624YR7-Tino5-1	Panaphidini	Panaphidina	Tinocallis (Tinocallis) zelkowae	Korea	Gangwon-do, Yeongwol-gun, Kim Satgat-myeon	37˚07'32''N 128˚34'12''E	26.vi.2014	Ulmaceae	Zelkova serrata	Yerim Lee
8		113	100	Tino5-2	KY307127	140624YR7-Tino5-2	Panaphidini	Panaphidina	Tinocallis (Tinocallis) zelkowae	Korea	Gangwon-do, Yeongwol-gun, Kim Satgat-myeon	37˚07'32''N 128˚34'12''E	26.vi.2014	Ulmaceae	Zelkova serrata	Yerim Lee
		115	104	U19	KY307128	011017SH6-U19	Panaphidini	Panaphidina	Tinocallis (Tinocallis) zelkowae	Korea	Gyeonggi-do, Suwon-si, Gwonseon-gu	37˚15'25''N 126˚58'19''E	17.x.2001	Ulmaceae	Zelkova serrata	Seunghwan Lee
		127	113	W1	KY307129	130608HS3-W1	Panaphidini	Panaphidina	Tinocallis (Tinocallis) zelkowae	Korea	Seosan-si, Seoklim-dong	36˚46'12''N 126˚27'56''E	8.vi.2013	Ulmaceae	Zelkova serrata	Hyoseok Lee
12		128	114	Z11	KY307130	140801YR13-Z11	Panaphidini	Panaphidina	Tinocallis (Tinocallis) zelkowae	Korea	Jeju-Island, Jeju-si, Jeju University	33˚27'19''N 126˚33'41''E	1.viii.2014	Ulmaceae	Zelkova serrata	Yerim Lee
12		128	114	Z5-2	KY307131	130512YR4-Z5-2	Panaphidini	Panaphidina	Tinocallis (Tinocallis) zelkowae	Korea	Seoul, Ewha Womans University	37˚33'42''N 126˚56'48''E	12.v.2013	Ulmaceae	Zelkova serrata	Yerim Lee
		133	112	Z5-3	KY307132	130512YR4-Z5-3	Panaphidini	Panaphidina	Tinocallis (Tinocallis) zelkowae	Korea	Seoul, Ewha Womans University	37˚33'42''N 126˚56'48''E	12.v.2013	Ulmaceae	Zelkova serrata	Yerim Lee
		133	112	Z5-n1	KY307133	130512YR4-Z5-n1	Panaphidini	Panaphidina	Tinocallis (Tinocallis) zelkowae	Korea	Seoul, Ewha Womans University	37˚33'42''N 126˚56'48''E	12.v.2013	Ulmaceae	Zelkova serrata	Yerim Lee
		133	112	Z5-n2	KY307134	130512YR4-Z5-n2	Panaphidini	Panaphidina	Tinocallis (Tinocallis) zelkowae	Korea	Seoul, Ewha Womans University	37˚33'42''N 126˚56'48''E	12.v.2013	Ulmaceae	Zelkova serrata	Yerim Lee
		133	112	Z5-n3	KY307135	130512YR4-Z5-n3	Panaphidini	Panaphidina	Tinocallis (Tinocallis) zelkowae	Korea	Seoul, Ewha Womans University	37˚33'42''N 126˚56'48''E	12.v.2013	Ulmaceae	Zelkova serrata	Yerim Lee
		133	112	Z8	KY307136	130728YR38-Z8	Panaphidini	Panaphidina	Tinocallis (Tinocallis) zelkowae	Korea	Chungcheongnam-do, Cheonan-si, Guseong-dong, Cheonan-service area	36˚47'16''N 127˚10'24''E	28.vii.2013	Ulmaceae	Zelkova serrata	Yerim Lee
		133	112	Z9	KY307137	130829YR13-Z9	Panaphidini	Panaphidina	Tinocallis (Tinocallis) zelkowae	Korea	Gangwon-do, Wonju-si, near by Mt. Chiaksan	37°23'06''N 128°00'44''E	29.viii.2013	Ulmaceae	Zelkova serrata (var. latifoliae)	Yerim Lee
				Pol3-1	KY307138	150515MK-Pol3-1	Panaphidini	Myzocallidina	Tuberculatus (Tuberculoides) annulatus	Poland	Katowice	50°15'53''N 19°01'25''E	15.v.2015	Fabaceae	Quercus robur	Mariusz Kanturski
9	47	117	105	Pol3-2	KY307139	150515MK-Pol3-2	Panaphidini	Myzocallidina	Tuberculatus (Tuberculoides) annulatus	Poland	Katowice	50°15'53''N 19°01'25''E	15.v.2015	Fabaceae	Quercus robur	Mariusz Kanturski
		126	112	Pol9-1	KY307140	150616LD-Pol9-1	Panaphidini	Myzocallidina	Tuberculatus (Tuberculoides) annulatus	Poland	Piekary Śląskie	50˚22'44''N 18˚55'37''E	16.vi.2015	Fabaceae	Quercus sp.	Ł. Depa
		126	112	Pol9-2	KY307141	150616LD-Pol9-2	Panaphidini	Myzocallidina	Tuberculatus (Tuberculoides) annulatus	Poland	Piekary Śląskie	50˚22'44''N 18˚55'37''E	16.vi.2015	Fabaceae	Quercus sp.	Ł. Depa
		126	112	Pol9-3	KY307142	150616LD-Pol9-3	Panaphidini	Myzocallidina	Tuberculatus (Tuberculoides) annulatus	Poland	Piekary Śląskie	50˚22'44''N 18˚55'37''E	16.vi.2015	Fabaceae	Quercus sp.	Ł. Depa
		29	28	Q52-1	KY307143	140510YR18-Q52-1	Panaphidini	Myzocallidina	Tuberculatus (Acanthocallis) macrotuberculatus	Korea	Chungcheongnam-do, Taean-gun	36˚44'44''N 126˚17'52''E	10.v.2014	Fagaceae	Quercus dentata	Yerim Lee & Hyoseok Lee
		29	28	Q52-2	KY307144	140510YR18-Q52-2	Panaphidini	Myzocallidina	Tuberculatus (Acanthocallis) macrotuberculatus	Korea	Chungcheongnam-do, Taean-gun	36˚44'44''N 126˚17'52''E	10.v.2014	Fagaceae	Quercus dentata	Yerim Lee & Hyoseok Lee
		116	105	JA111-1	KY307145	110923-JA111-1	Panaphidini	Myzocallidina	Tuberculatus (Acanthocallis) quercicola	Japan	Hokkaido, Utoro	44˚04'05''N 144˚59'44''E	23.ix.2011	Fagaceae	Quercus crispula	unknown
		107	99	JA111-2	KY307146	110923-JA111-2	Panaphidini	Myzocallidina	Tuberculatus (Acanthocallis) quercicola	Japan	Hokkaido, Utoro	44˚04'05''N 144˚59'44''E	23.ix.2011	Fagaceae	Quercus crispula	unknown
				JA195-1	KY307147	080622-JA195-1	Panaphidini	Myzocallidina	Tuberculatus (Acanthocallis) quercicola	Japan	Hokkaido, Ebetsu	43˚06'13''N 141˚32'10''E	22.vi.2008	Fagaceae	Quercus crispula	unknown
		116	105	JA195-2	KY307148	080622-JA195-2	Panaphidini	Myzocallidina	Tuberculatus (Acanthocallis) quercicola	Japan	Hokkaido, Ebetsu	43˚06'13''N 141˚32'10''E	22.vi.2008	Fagaceae	Quercus crispula	unknown
	44	105	97	JP9-1	KY307149	110923-JP9-1	Panaphidini	Myzocallidina	Tuberculatus (Acanthocallis) quercicola	Japan	Hokkaido, Utoro	44˚04'05''N 144˚59'44''E	23.ix.2011	Fagaceae	Quercus crispula	unknown
	44	105	97	JP9-2	KY307150	110923-JP9-2	Panaphidini	Myzocallidina	Tuberculatus (Acanthocallis) quercicola	Japan	Hokkaido, Utoro	44˚04'05''N 144˚59'44''E	23.ix.2011	Fagaceae	Quercus crispula	unknown
9	47	117	105	Q17-1	KY307151	130713YR7-Q17-1	Panaphidini	Myzocallidina	Tuberculatus (Acanthocallis) quercicola	Korea	Gyeonggi-do, Yangpyeong-gun, Yongmun-recreation forest	37˚30'58''N 127˚31'09''E	13.vii.2013	Fagaceae	Quercus aliena	Yerim Lee & Hyoseok Lee
				Q17-2	KY307152	130713YR7-Q17-2	Panaphidini	Myzocallidina	Tuberculatus (Acanthocallis) quercicola	Korea	Gyeonggi-do, Yangpyeong-gun, Yongmun-recreation forest	37˚30'58''N 127˚31'09''E	13.vii.2013	Fagaceae	Quercus aliena	Yerim Lee & Hyoseok Lee
9	47	117	105	Q17-3	KY307153	130713YR7-Q17-3	Panaphidini	Myzocallidina	Tuberculatus (Acanthocallis) quercicola	Korea	Gyeonggi-do, Yangpyeong-gun, Yongmun-recreation forest	37˚30'58''N 127˚31'09''E	13.vii.2013	Fagaceae	Quercus aliena	Yerim Lee & Hyoseok Lee
9	47	117	105	Q17-4	KY307154	130713YR7-Q17-4	Panaphidini	Myzocallidina	Tuberculatus (Acanthocallis) quercicola	Korea	Gyeonggi-do, Yangpyeong-gun, Yongmun-recreation forest	37˚30'58''N 127˚31'09''E	13.vii.2013	Fagaceae	Quercus aliena	Yerim Lee & Hyoseok Lee
13		131	110	Q17-5	KY307155	130713YR7-Q17-5	Panaphidini	Myzocallidina	Tuberculatus (Acanthocallis) quercicola	Korea	Gyeonggi-do, Yangpyeong-gun, Yongmun-recreation forest	37˚30'58''N 127˚31'09''E	13.vii.2013	Fagaceae	Quercus aliena	Yerim Lee & Hyoseok Lee
		115	104	Q39-1	KY307156	130916YR3-Q39-1	Panaphidini	Myzocallidina	Tuberculatus (Acanthocallis) quercicola	Korea	Seoul, Gwanak-gu, Seoul National University	37˚27'35''N 126˚57'06''E	16.xi.2013	Fagaceae	Quercus mongolica	Yerim Lee & Hyoseok Lee
		115	104	Q39-2	KY307157	130916YR3-Q39-2	Panaphidini	Myzocallidina	Tuberculatus (Acanthocallis) quercicola	Korea	Seoul, Gwanak-gu, Seoul National University	37˚27'35''N 126˚57'06''E	16.ix.2013	Fagaceae	Quercus mongolica	Yerim Lee & Hyoseok Lee
		115	104	Q39-3	KY307158	130916YR3-Q39-3	Panaphidini	Myzocallidina	Tuberculatus (Acanthocallis) quercicola	Korea	Seoul, Gwanak-gu, Seoul National University	37˚27'35''N 126˚57'06''E	16.ix.2013	Fagaceae	Quercus mongolica	Yerim Lee & Hyoseok Lee
		115	104	Q39-4	KY307159	130916YR3-Q39-4	Panaphidini	Myzocallidina	Tuberculatus (Acanthocallis) quercicola	Korea	Seoul, Gwanak-gu, Seoul National University	37˚27'35''N 126˚57'06''E	16.ix.2013	Fagaceae	Quercus mongolica	Yerim Lee & Hyoseok Lee
		33	32	Q39-5	KY307160	130916YR3-Q39-5	Panaphidini	Myzocallidina	Tuberculatus (Acanthocallis) quercicola	Korea	Seoul, Gwanak-gu, Seoul National University	37˚27'35''N 126˚57'06''E	16.ix.2013	Fagaceae	Quercus mongolica	Yerim Lee & Hyoseok Lee
		33	32	Q4-1	KY307161	080721HJ15-Q4-1	Panaphidini	Myzocallidina	Tuberculatus (Acanthocallis) quercicola	Korea	Gyeonggi-do, Yangju-si, Nam-myeon	37˚53'53''N 126˚58'36''E	21.vii.2008	Fagaceae	Quercus aliena	Hyojoong Kim
		115	104	Q4-2	KY307162	080721HJ15-Q4-2	Panaphidini	Myzocallidina	Tuberculatus (Acanthocallis) quercicola	Korea	Gyeonggi-do, Yangju-si, Nam-myeon	37˚53'53''N 126˚58'36''E	21.vii.2008	Fagaceae	Quercus aliena	Hyojoong Kim
		133	112	Q4-3	KY307163	080721HJ15-Q4-3	Panaphidini	Myzocallidina	Tuberculatus (Acanthocallis) quercicola	Korea	Gyeonggi-do, Yangju-si, Nam-myeon	37˚53'53''N 126˚58'36''E	21.vii.2008	Fagaceae	Quercus aliena	Hyojoong Kim
				Q4-4	KY307164	080721HJ15-Q4-4	Panaphidini	Myzocallidina	Tuberculatus (Acanthocallis) quercicola	Korea	Gyeonggi-do, Yangju-si, Nam-myeon	37˚53'53''N 126˚58'36''E	21.vii.2008	Fagaceae	Quercus aliena	Hyojoong Kim
		32	31	Q5	KY307165	080721HJ15-Q5	Panaphidini	Myzocallidina	Tuberculatus (Acanthocallis) quercicola	Korea	Gyeonggi-do, Yangju-si, Nam-myeon	37˚53'53''N 126˚58'36''E	21.vii.2008	Fagaceae	Quercus aliena	Hyojoong Kim
8		113	100	TQ1-1	KY307166	120616HR2-TQ1-1	Panaphidini	Myzocallidina	Tuberculatus (Acanthocallis) quercicola	Korea	Gyeonggi-do, Gwangju-si, Mt. Taehwasan	37˚17'31''N 127˚17'19''E	16.vi.2012	Fagaceae	Quercus aliena	Hwalran Choi
				TQ1-2	KY307167	120616HR2-TQ1-2	Panaphidini	Myzocallidina	Tuberculatus (Acanthocallis) quercicola	Korea	Gyeonggi-do, Gwangju-si, Mt. Taehwasan	37˚17'31''N 127˚17'19''E	16.vi.2012	Fagaceae	Quercus aliena	Hwalran Choi
				TQ1-3	KY307168	120616HR2-TQ1-3	Panaphidini	Myzocallidina	Tuberculatus (Acanthocallis) quercicola	Korea	Gyeonggi-do, Gwangju-si, Mt. Taehwasan	37˚17'31''N 127˚17'19''E	16.vi.2012	Fagaceae	Quercus aliena	Hwalran Choi
7	45	108	99	TQ1-4	KY307169	120616HR2-TQ1-4	Panaphidini	Myzocallidina	Tuberculatus (Acanthocallis) quercicola	Korea	Gyeonggi-do, Gwangju-si, Mt. Taehwasan	37˚17'31''N 127˚17'19''E	16.vi.2012	Fagaceae	Quercus aliena	Hwalran Choi
		111	102	TQ1-5	KY307170	120616HR2-TQ1-5	Panaphidini	Myzocallidina	Tuberculatus (Acanthocallis) quercicola	Korea	Gyeonggi-do, Gwangju-si, Mt. Taehwasan	37˚17'31''N 127˚17'19''E	16.vi.2012	Fagaceae	Quercus aliena	Hwalran Choi
		110	101	TQ1-6	KY307171	120616HR2-TQ1-6	Panaphidini	Myzocallidina	Tuberculatus (Acanthocallis) quercicola	Korea	Gyeonggi-do, Gwangju-si, Mt. Taehwasan	37˚17'31''N 127˚17'19''E	16.vi.2012	Fagaceae	Quercus aliena	Hwalran Choi
		107	99	Q16	KY307172	130512YR12-Q16	Panaphidini	Myzocallidina	Tuberculatus (Acanthotuberculatus) indicus	Korea	Seoul, Ewha Womans University	37˚33'42''N 126˚56'48''E	26.iv.2014	Fagaceae	Quercus acutissima	Yerim Lee & Hyoseok Lee
6	42	101	97	Q23	KY307173	130724YR5-Q23	Panaphidini	Myzocallidina	Tuberculatus (Acanthotuberculatus) indicus	Korea	Jeollanam-do, Gwangyang-si, Chusan-research forest	35˚01'56''N 127˚36'21''E	24.vii.2014	Fagaceae	Quercus acutissima	Yerim Lee
				Q24	KY307174	130725YR9-Q24	Panaphidini	Myzocallidina	Tuberculatus (Acanthotuberculatus) indicus	Korea	Jeollanam-do, Gwangyang-si, Chusan-research forest	35˚01'56''N 127˚36'21''E	25.vii.2014	Fagaceae	Quercus acutissima	Yerim Lee
		29	28	Q59	KY307175	140801YR8-Q59	Panaphidini	Myzocallidina	Tuberculatus (Acanthotuberculatus) indicus	Korea	Jeju-Island, Jeju-si, near by Seongpanak	33˚24'02''N 126˚37'06''E	1.viii.2014	Fagaceae	Quercus acutissima	Yerim Lee
	28	74	72	Q61	KY307176	140630YR9-Q61	Panaphidini	Myzocallidina	Tuberculatus (Acanthotuberculatus) indicus	Korea	Gyeongsangbuk-do, Gumi-si, Seonsan-service area	36˚16'40''N 128˚14'57''E	30.vi.2014	Fagaceae	Quercus acutissima	Yerim Lee
		33	32	Q8	KY307177	090515SH16-Q8	Panaphidini	Myzocallidina	Tuberculatus (Acanthotuberculatus) indicus	Korea	Jeollanam-do, Jangheong-gun, Cheongwan-recreation forest	34˚32'43''N 126˚54'07''E	15.v.2009	Fagaceae	Quercus sp.	Seunghwan Lee
				TI1-1	KY307178	150523YR-TI1-1	Panaphidini	Myzocallidina	Tuberculatus (Acanthotuberculatus) indicus	Korea	Gyeonggi-do, Anseong-si	37˚00'28''N 127˚16'46''E	23.v.2015	Fagaceae	Quercus acutissima	Yerim Lee & Hyoseok Lee
				TI1-n1	KY307179	150523YR-TI1-n1	Panaphidini	Myzocallidina	Tuberculatus (Acanthotuberculatus) indicus	Korea	Gyeonggi-do, Anseong-si	37˚00'28''N 127˚16'46''E	23.v.2015	Fagaceae	Quercus acutissima	Yerim Lee & Hyoseok Lee
				TI1-n2	KY307180	150523YR-TI1-n2	Panaphidini	Myzocallidina	Tuberculatus (Acanthotuberculatus) indicus	Korea	Gyeonggi-do, Anseong-si	37˚00'28''N 127˚16'46''E	23.v.2015	Fagaceae	Quercus acutissima	Yerim Lee & Hyoseok Lee
7	45	108	99	TI1-n3	KY307181	150523YR-TI1-n3	Panaphidini	Myzocallidina	Tuberculatus (Acanthotuberculatus) indicus	Korea	Gyeonggi-do, Anseong-si	37˚00'28''N 127˚16'46''E	23.v.2015	Fagaceae	Quercus acutissima	Yerim Lee & Hyoseok Lee
8		113	100	TI2	KY307182	140714YR4-TI2	Panaphidini	Myzocallidina	Tuberculatus (Acanthotuberculatus) indicus	Korea	Gyeongsangnam-do, Geoje-Island	34˚53'12''N 128˚37'25''E	14.vii.2014	Fagaceae	Quercus acutissima	Yerim Lee & Hyoseok Lee
		32	31	Q47-1	KY307183	131028YR1-Q47-1	Panaphidini	Myzocallidina	Tuberculatus (Acanthotuberculatus) japonicus	Korea	Seoul, Gwanak-gu, Seoul National University	37˚27'35''N 126˚57'06''E	28.x.2013	Fagaceae	Quercus sp.	Yerim Lee & Hyoseok Lee
		133	112	Q2-1	KY307184	080721HJ16-Q2-1	Panaphidini	Myzocallidina	Tuberculatus (Arakawana) stigmatus	Korea	Gyeonggi-do, Yangju-si, Nam-myeon	37˚53'53''N 126˚58'36''E	21.vii.2008	Fagaceae	Quercus sp.	Hyojoong Kim
	41	100	96	Q2-2	KY307185	080721HJ16-Q2-2	Panaphidini	Myzocallidina	Tuberculatus (Arakawana) stigmatus	Korea	Gyeonggi-do, Yangju-si, Nam-myeon	37˚53'53''N 126˚58'36''E	21.vii.2008	Fagaceae	Quercus sp.	Hyojoong Kim
6	42	101	97	Q2-3	KY307186	080721HJ16-Q2-3	Panaphidini	Myzocallidina	Tuberculatus (Arakawana) stigmatus	Korea	Gyeonggi-do, Yangju-si, Nam-myeon	37˚53'53''N 126˚58'36''E	21.vii.2008	Fagaceae	Quercus sp.	Hyojoong Kim
				Q2-4	KY307187	080721HJ16-Q2-4	Panaphidini	Myzocallidina	Tuberculatus (Arakawana) stigmatus	Korea	Gyeonggi-do, Yangju-si, Nam-myeon	37˚53'53''N 126˚58'36''E	21.vii.2008	Fagaceae	Quercus sp.	Hyojoong Kim
		129	114	Q28	KY307188	130814YR5-Q28	Panaphidini	Myzocallidina	Tuberculatus (Arakawana) stigmatus	Korea	Gangwon-do, Yangyang-gun, Mt. Manwolsan	37˚57'11''N 128˚41'37''E	14.viii.2013	Fagaceae	Quercus sp.	Yerim Lee
		129	114	Q29	KY307189	130820YR11-Q29	Panaphidini	Myzocallidina	Tuberculatus (Arakawana) stigmatus	Korea	Gangwon-do, Chiak-Recreational forest	37˚15'21''N 128˚01'52''E	20.viii.2013	Fagaceae	Quercus sp.	Yerim Lee
9	47	117	105	Q3	KY307190	080721HJ16-Q3	Panaphidini	Myzocallidina	Tuberculatus (Arakawana) stigmatus	Korea	Gyeonggi-do, Yangju-si, Nam-myeon	37˚53'53''N 126˚58'36''E	21.vii.2008	Fagaceae	Quercus sp.	Hyojoong Kim
		29	28	Q58	KY307191	140516YR2-Q58	Panaphidini	Myzocallidina	Tuberculatus (Arakawana) stigmatus	Korea	Gyeonggi-do, Yongin-si, Sinwon-ri	37˚18'47''N 127˚13'04''E	16.v.2014	Fagaceae	Quercus sp.	Yerim Lee & Hyoseok Lee
		33	32	Q83-1	KY307192	140510YR4-Q83-1	Panaphidini	Myzocallidina	Tuberculatus (Arakawana) stigmatus	Korea	Chungcheongnam-do, Cheongyang-gun, Mt. Chilgapsan	36˚24'48''N 126˚53'03''E	10.v.2014	Fagaceae	Quercus sp.	Yerim Lee & Hyoseok Lee
		33	32	Q83-2	KY307193	140510YR4-Q83-2	Panaphidini	Myzocallidina	Tuberculatus (Arakawana) stigmatus	Korea	Chungcheongnam-do, Cheongyang-gun, Mt. Chilgapsan	36˚24'48''N 126˚53'03''E	10.v.2014	Fagaceae	Quercus sp.	Yerim Lee & Hyoseok Lee
		33	32	Q83-3	KY307194	140510YR4-Q83-3	Panaphidini	Myzocallidina	Tuberculatus (Arakawana) stigmatus	Korea	Chungcheongnam-do, Cheongyang-gun, Mt. Chilgapsan	36˚24'48''N 126˚53'03''E	10.v.2014	Fagaceae	Quercus sp.	Yerim Lee & Hyoseok Lee
		33	32	Q84	KY307195	140509YR3-Q84	Panaphidini	Myzocallidina	Tuberculatus (Arakawana) stigmatus	Korea	Gyeonggi-do, Gapyeong-gun, Mt. Jugeumsan	38˚08'38''N 126˚54'17''E	9.v.2014	Fagaceae	Quercus sp.	Yerim Lee
				Tub4	KY307196	140426YR-Tub4	Panaphidini	Myzocallidina	Tuberculatus (Arakawana) stigmatus	Korea	Seoul, Gwanak-gu, Seoul National University	37˚27'35''N 126˚57'06''E	26.iv.2014	Fabaceae	Quercus sp.	Yerim Lee & Hyoseok Lee
		107	99	JP2-1	KY307197	050813-JP2-1	Panaphidini	Myzocallidina	Tuberculatus (Nippocallis) kuricola	Japan	Hokkaido, Iwamizawa	43˚12'14''N 141˚45'34''E	13.viii.2005	Fabaceae	Castanea crenata	unknown
		107	99	JP2-2	KY307198	050813-JP2-2	Panaphidini	Myzocallidina	Tuberculatus (Nippocallis) kuricola	Japan	Hokkaido, Iwamizawa	43˚12'14''N 141˚45'34''E	13.viii.2005	Fabaceae	Castanea crenata	unknown
9	47	117	105	JP2-3	KY307199	050813-JP2-3	Panaphidini	Myzocallidina	Tuberculatus (Nippocallis) kuricola	Japan	Hokkaido, Iwamizawa	43˚12'14''N 141˚45'34''E	13.viii.2005	Fabaceae	Castanea crenata	unknown
		106	98	NK1-1	KY307200	150531YR-NK1-1	Panaphidini	Myzocallidina	Tuberculatus (Nippocallis) kuricola	Korea	Gangwon-do, Yanggu-gun	38˚06'36''N 127˚59'23''E	31.v.2015	Fagaceae	Castanea crenata	Yerim Lee & Hyoseok Lee
		106	98	NK1-2	KY307201	150531YR-NK1-2	Panaphidini	Myzocallidina	Tuberculatus (Nippocallis) kuricola	Korea	Gangwon-do, Yanggu-gun	38˚06'36''N 127˚59'23''E	31.v.2015	Fagaceae	Castanea crenata	Yerim Lee & Hyoseok Lee
		106	98	NK1-4	KY307202	150531YR-NK1-4	Panaphidini	Myzocallidina	Tuberculatus (Nippocallis) kuricola	Korea	Gangwon-do, Yanggu-gun	38˚06'36''N 127˚59'23''E	31.v.2015	Fagaceae	Castanea crenata	Yerim Lee & Hyoseok Lee
9	47	117	105	NK1-5	KY307203	150531YR-NK1-5	Panaphidini	Myzocallidina	Tuberculatus (Nippocallis) kuricola	Korea	Gangwon-do, Yanggu-gun	38˚06'36''N 127˚59'23''E	31.v.2015	Fagaceae	Castanea crenata	Yerim Lee & Hyoseok Lee
		107	99	NK1-7	KY307204	150531YR-NK1-7	Panaphidini	Myzocallidina	Tuberculatus (Nippocallis) kuricola	Korea	Gangwon-do, Yanggu-gun	38˚06'36''N 127˚59'23''E	31.v.2015	Fagaceae	Castanea crenata	Yerim Lee & Hyoseok Lee
		106	98	NK1-8	KY307205	150531YR-NK1-8	Panaphidini	Myzocallidina	Tuberculatus (Nippocallis) kuricola	Korea	Gangwon-do, Yanggu-gun	38˚06'36''N 127˚59'23''E	31.v.2015	Fagaceae	Castanea crenata	Yerim Lee & Hyoseok Lee
7	45	108	99	NK2-1	KY307206	150601YR-NK2-1	Panaphidini	Myzocallidina	Tuberculatus (Nippocallis) kuricola	Korea	Gyeonggi-do, Osan-si, Sucheong-dong	37˚09'56''N 127˚03'52''E	1.vi.2015	Fabaceae	Castanea crenata	Yerim Lee
		107	99	NK2-2	KY307207	150601YR-NK2-2	Panaphidini	Myzocallidina	Tuberculatus (Nippocallis) kuricola	Korea	Gyeonggi-do, Osan-si, Sucheong-dong	37˚09'56''N 127˚03'52''E	1.vi.2015	Fabaceae	Castanea crenata	Yerim Lee
		107	99	NK3-1	KY307208	150612YR-NK3-1	Panaphidini	Myzocallidina	Tuberculatus (Nippocallis) kuricola	Korea	Gyeonggi-do, Yangpyeong-gun	37˚29'28''N 127˚29'15''E	12.vi.2015	Fabaceae	Castanea crenata	Yerim Lee
3	15	40	37	NK3-2	KY307209	150612YR-NK3-2	Panaphidini	Myzocallidina	Tuberculatus (Nippocallis) kuricola	Korea	Gyeonggi-do, Yangpyeong-gun	37˚29'28''N 127˚29'15''E	12.vi.2015	Fabaceae	Castanea crenata	Yerim Lee
3	15	40	37	NK3-3	KY307210	150612YR-NK3-3	Panaphidini	Myzocallidina	Tuberculatus (Nippocallis) kuricola	Korea	Gyeonggi-do, Yangpyeong-gun	37˚29'28''N 127˚29'15''E	12.vi.2015	Fabaceae	Castanea crenata	Yerim Lee
		136	115	NK3-4	KY307211	150612YR-NK3-4	Panaphidini	Myzocallidina	Tuberculatus (Nippocallis) kuricola	Korea	Gyeonggi-do, Yangpyeong-gun	37˚29'28''N 127˚29'15''E	12.vi.2015	Fabaceae	Castanea crenata	Yerim Lee
		136	115	NK3-5	KY307212	150612YR-NK3-5	Panaphidini	Myzocallidina	Tuberculatus (Nippocallis) kuricola	Korea	Gyeonggi-do, Yangpyeong-gun	37˚29'28''N 127˚29'15''E	12.vi.2015	Fabaceae	Castanea crenata	Yerim Lee
		106	98	NK3-6	KY307213	150612YR-NK3-6	Panaphidini	Myzocallidina	Tuberculatus (Nippocallis) kuricola	Korea	Gyeonggi-do, Yangpyeong-gun	37˚29'28''N 127˚29'15''E	12.vi.2015	Fabaceae	Castanea crenata	Yerim Lee
		106	98	NK3-7	KY307214	150612YR-NK3-7	Panaphidini	Myzocallidina	Tuberculatus (Nippocallis) kuricola	Korea	Gyeonggi-do, Yangpyeong-gun	37˚29'28''N 127˚29'15''E	12.vi.2015	Fabaceae	Castanea crenata	Yerim Lee
		106	98	NK3-n1	KY307215	150612YR-NK3-n1	Panaphidini	Myzocallidina	Tuberculatus (Nippocallis) kuricola	Korea	Gyeonggi-do, Yangpyeong-gun	37˚29'28''N 127˚29'15''E	12.vi.2015	Fabaceae	Castanea crenata	Yerim Lee
		107	99	NK4-1	KY307216	150523YR-NK4-1	Panaphidini	Myzocallidina	Tuberculatus (Nippocallis) kuricola	Korea	Gyeonggi-do, Yongin-si, Sinwon-ri	37˚18'47''N 127˚13'04''E	23.v.2015	Fabaceae	Castanea crenata	Yerim Lee & Hyoseok Lee
		107	99	NK4-2	KY307217	150523YR-NK4-2	Panaphidini	Myzocallidina	Tuberculatus (Nippocallis) kuricola	Korea	Gyeonggi-do, Yongin-si, Sinwon-ri	37˚18'47''N 127˚13'04''E	23.v.2015	Fabaceae	Castanea crenata	Yerim Lee & Hyoseok Lee
		106	98	NK5-1	KY307218	150523YR-NK5-1	Panaphidini	Myzocallidina	Tuberculatus (Nippocallis) kuricola	Korea	Gyeonggi-do, Anseong-si	37˚00'28''N 127˚16'46''E	23.v.2015	Fabaceae	Castanea crenata	Yerim Lee & Hyoseok Lee
		106	98	NK5-2	KY307219	150523YR-NK5-2	Panaphidini	Myzocallidina	Tuberculatus (Nippocallis) kuricola	Korea	Gyeonggi-do, Anseong-si	37˚00'28''N 127˚16'46''E	23.v.2015	Fabaceae	Castanea crenata	Yerim Lee & Hyoseok Lee
		106	98	NK5-n1	KY307220	150523YR-NK5-n1	Panaphidini	Myzocallidina	Tuberculatus (Nippocallis) kuricola	Korea	Gyeonggi-do, Anseong-si	37˚00'28''N 127˚16'46''E	23.v.2015	Fabaceae	Castanea crenata	Yerim Lee & Hyoseok Lee
		106	98	NK5-n2	KY307221	150523YR-NK5-n2	Panaphidini	Myzocallidina	Tuberculatus (Nippocallis) kuricola	Korea	Gyeonggi-do, Anseong-si	37˚00'28''N 127˚16'46''E	23.v.2015	Fabaceae	Castanea crenata	Yerim Lee & Hyoseok Lee
		106	98	NK5-n3	KY307222	150523YR-NK5-n3	Panaphidini	Myzocallidina	Tuberculatus (Nippocallis) kuricola	Korea	Gyeonggi-do, Anseong-si	37˚00'28''N 127˚16'46''E	23.v.2015	Fabaceae	Castanea crenata	Yerim Lee & Hyoseok Lee
		116	105	Q25	KY307223	130725YR10-Q25	Panaphidini	Myzocallidina	Tuberculatus (Nippocallis) kuricola	Korea	Jeollanam-do, Gwangyang-si, Chusan-research forest	35˚01'56''N 127˚36'21''E	25.vii.2013	Fagaceae	Castanea crenata	Yerim Lee
		33	32	Q42	KY307224	130917HS3-Q42	Panaphidini	Myzocallidina	Tuberculatus (Nippocallis) kuricola	Korea	Gyeonggi-do, Namyangju-si, Mt. Ungilsan	37˚34'19''N 127˚17'42''E	17.ix.2013	Fagaceae	Castanea sp.	Hyoseok Lee
		28	27	Q51	KY307225	140510YR2-Q51	Panaphidini	Myzocallidina	Tuberculatus (Nippocallis) kuricola	Korea	Chungcheongnam-do, Cheongyang-gun, Mt. Chilgapsan	36˚24'48''N 126˚53'03''E	10.v.2014	Fagaceae	Castanea crenata	Yerim Lee & Hyoseok Lee
		33	32	Q81	KY307226	140510YR8-Q81	Panaphidini	Myzocallidina	Tuberculatus (Nippocallis) kuricola	Korea	Chungcheongnam-do, Mt. Oseosan	36˚27'09''N 126˚40'23''E	10.v.2014	Fagaceae	Castanea crenata	Yerim Lee & Hyoseok Lee
		32	31	Q82-1	KY307227	140516YR4-Q82-1	Panaphidini	Myzocallidina	Tuberculatus (Nippocallis) kuricola	Korea	Gyeonggi-do, Yongin-si, Sinwon-ri	37˚18'47''N 127˚13'04''E	16.v.2014	Fagaceae	Castanea crenata	Yerim Lee & Hyoseok Lee
		98	94	Q82-2	KY307228	140516YR4-Q82-2	Panaphidini	Myzocallidina	Tuberculatus (Nippocallis) kuricola	Korea	Gyeonggi-do, Yongin-si, Sinwon-ri	37˚18'47''N 127˚13'04''E	16.v.2014	Fagaceae	Castanea crenata	Yerim Lee & Hyoseok Lee
		98	94	Q82-3	KY307229	140516YR4-Q82-3	Panaphidini	Myzocallidina	Tuberculatus (Nippocallis) kuricola	Korea	Gyeonggi-do, Yongin-si, Sinwon-ri	37˚18'47''N 127˚13'04''E	16.v.2014	Fagaceae	Castanea crenata	Yerim Lee & Hyoseok Lee
		33	32	Q82-4	KY307230	140516YR4-Q82-4	Panaphidini	Myzocallidina	Tuberculatus (Nippocallis) kuricola	Korea	Gyeonggi-do, Yongin-si, Sinwon-ri	37˚18'47''N 127˚13'04''E	16.v.2014	Fagaceae	Castanea crenata	Yerim Lee & Hyoseok Lee
		33	32	Q82-5	KY307231	140516YR4-Q82-5	Panaphidini	Myzocallidina	Tuberculatus (Nippocallis) kuricola	Korea	Gyeonggi-do, Yongin-si, Sinwon-ri	37˚18'47''N 127˚13'04''E	16.v.2014	Fagaceae	Castanea crenata	Yerim Lee & Hyoseok Lee
		33	32	Q82-6	KY307232	140516YR4-Q82-6	Panaphidini	Myzocallidina	Tuberculatus (Nippocallis) kuricola	Korea	Gyeonggi-do, Yongin-si, Sinwon-ri	37˚18'47''N 127˚13'04''E	16.v.2014	Fagaceae	Castanea crenata	Yerim Lee & Hyoseok Lee
		133	112	Q22	KY307233	130721YR2-Q22	Panaphidini	Myzocallidina	Tuberculatus (Orientuberculoides) capitatus	Korea	Seoul, Gwanak-gu, Seoul National University	37˚27'35''N 126˚57'06''E	21.vii.2013	Fagaceae	Quercus acutinnima	Yerim Lee & Hyoseok Lee
	14	39	38	TC1	KY307234	150514YR-TC1	Panaphidini	Myzocallidina	Tuberculatus (Orientuberculoides) capitatus	Korea	Seoul, Gwanak-gu, Seoul National University	37˚27'35''N 126˚57'06''E	14.v.2015	Fagaceae	Quercus acutinnima	Yerim Lee & Hyoseok Lee
	12	37	36	TC2-2	KY307235	140714YR4-TC2-2	Panaphidini	Myzocallidina	Tuberculatus (Orientuberculoides) capitatus	Korea	Gyeongsangnam-do, Geoje-Island	34˚53'12''N 128˚37'25''E	14.vii.2014	Fagaceae	Quercus acutinnima	Yerim Lee & Hyoseok Lee
		107	99	Q15	KY307236	130512YR9-Q15	Panaphidini	Myzocallidina	Tuberculatus (Orientuberculoides) fangi	Korea	Seoul, Ewha Womans University	37˚33'42''N 126˚56'48''E	12.v.2013	Fagaceae	Quercus acutinnima	Yerim Lee & Hyoseok Lee
13		131	110	Q19	KY307237	130719YR1-Q19	Panaphidini	Myzocallidina	Tuberculatus (Orientuberculoides) fangi	Korea	Seoul, Gwanak-gu, Seoul National University	37˚27'35''N 126˚57'06''E	19.vii.2013	Fagaceae	Quercus acutinnima	Yerim Lee & Hyoseok Lee
				Q20	KY307238	130719YR1-Q20	Panaphidini	Myzocallidina	Tuberculatus (Orientuberculoides) fangi	Korea	Seoul, Gwanak-gu, Seoul National University	37˚27'35''N 126˚57'06''E	19.vii.2013	Fagaceae	Quercus acutinnima	Yerim Lee & Hyoseok Lee
	12	37	36	Q36	KY307239	130916YR1-Q36	Panaphidini	Myzocallidina	Tuberculatus (Orientuberculoides) fangi	Korea	Seoul, Gwanak-gu, Seoul National University	37˚27'35''N 126˚57'06''E	16.ix.2013	Fagaceae	Quercus acutinnima	Yerim Lee & Hyoseok Lee
	16	41	39	Q37	KY307240	130916YR2-Q37	Panaphidini	Myzocallidina	Tuberculatus (Orientuberculoides) fangi	Korea	Seoul, Gwanak-gu, Seoul National University	37˚27'35''N 126˚57'06''E	16.ix.2013	Fagaceae	Quercus acutinnima	Yerim Lee & Hyoseok Lee
		115	104	Q43	KY307241	131028YR1-Q43	Panaphidini	Myzocallidina	Tuberculatus (Orientuberculoides) fangi	Korea	Seoul, Gwanak-gu, Seoul National University	37˚27'35''N 126˚57'06''E	28.x.2013	Fagaceae	Quercus acutinnima	Yerim Lee & Hyoseok Lee
		32	31	Q47-2	KY307242	131028YR1-Q47-2	Panaphidini	Myzocallidina	Tuberculatus (Orientuberculoides) fangi	Korea	Seoul, Gwanak-gu, Seoul National University	37˚27'35''N 126˚57'06''E	28.x.2013	Fagaceae	Quercus acutinnima	Yerim Lee & Hyoseok Lee
		33	32	Q69	KY307243	130721YR2-Q69	Panaphidini	Myzocallidina	Tuberculatus (Orientuberculoides) fangi	Korea	Seoul, Gwanak-gu, Seoul National University	37˚27'35''N 126˚57'06''E	21.vii.2013	Fagaceae	Quercus acutinnima	Yerim Lee & Hyoseok Lee
	43	104	100	JP6-1	KY307244	080629-JP6-1	Panaphidini	Myzocallidina	Tuberculatus (Orientuberculoides) higuchii A	Japan	Hokkaido, Iwamizawa	43˚12'14''N 141˚45'34''E	29.vi.2008	Fabaceae	Quercus crispula	unknown
	43	104	100	JP6-2	KY307245	080629-JP6-2	Panaphidini	Myzocallidina	Tuberculatus (Orientuberculoides) higuchii A	Japan	Hokkaido, Iwamizawa	43˚12'14''N 141˚45'34''E	29.vi.2008	Fabaceae	Quercus crispula	unknown
3	15	40	37	Q32-1	KY307246	130908YR3-Q32-1	Panaphidini	Myzocallidina	Tuberculatus (Orientuberculoides) higuchii B	Korea	Gangwon-do, Taebaek-si, Mt. Hambaeksan	37˚09'41''N 128˚55'03''E	8.ix.2013	Fagaceae	Quercus sp.	Yerim Lee & Hyoseok Lee
3	15	40	37	Q32-n1	KY307247	130908YR3-Q32-n1	Panaphidini	Myzocallidina	Tuberculatus (Orientuberculoides) higuchii B	Korea	Gangwon-do, Taebaek-si, Mt. Hambaeksan	37˚09'41''N 128˚55'03''E	8.ix.2013	Fagaceae	Quercus sp.	Yerim Lee & Hyoseok Lee
3	15	40	37	Q32-n2	KY307248	130908YR3-Q32-n2	Panaphidini	Myzocallidina	Tuberculatus (Orientuberculoides) higuchii B	Korea	Gangwon-do, Taebaek-si, Mt. Hambaeksan	37˚09'41''N 128˚55'03''E	8.ix.2013	Fagaceae	Quercus sp.	Yerim Lee & Hyoseok Lee
3	15	40	37	Q32-n3	KY307249	130908YR3-Q32-n3	Panaphidini	Myzocallidina	Tuberculatus (Orientuberculoides) higuchii B	Korea	Gangwon-do, Taebaek-si, Mt. Hambaeksan	37˚09'41''N 128˚55'03''E	8.ix.2013	Fagaceae	Quercus sp.	Yerim Lee & Hyoseok Lee
3	15	40	37	Q33	KY307250	130908YR3-Q33	Panaphidini	Myzocallidina	Tuberculatus (Orientuberculoides) higuchii B	Korea	Gangwon-do, Taebaek-si, Mt. Hambaeksan	37˚09'41''N 128˚55'03''E	8.ix.2013	Fagaceae	Quercus sp.	Yerim Lee & Hyoseok Lee
	38	96	92	Q6	KY307251	090419HJ1-Q6	Panaphidini	Myzocallidina	Tuberculatus (Orientuberculoides) higuchii B	Korea	Seoul, Gwanak-gu, Seoul National University	37˚27'35''N 126˚57'06''E	19.iv.2009	Fagaceae	Quercus sp.	Hyojoong Kim
		33	32	Q7	KY307252	090419HJ1-Q7	Panaphidini	Myzocallidina	Tuberculatus (Orientuberculoides) higuchii B	Korea	Seoul, Gwanak-gu, Seoul National University	37˚27'35''N 126˚57'06''E	19.iv.2009	Fagaceae	Quercus sp.	Hyojoong Kim
12		128	114	Q31	KY307253	130908YR2-Q31	Panaphidini	Myzocallidina	Tuberculatus (Orientuberculoides) higuchii C	Korea	Gangwon-do, Taebaek-si, Mt. Hambaeksan	37˚09'41''N 128˚55'03''E	8.ix.2013	Fagaceae	Quercus sp.	Yerim Lee & Hyoseok Lee
		33	32	Q87-1	KY307254	140426YR2-Q87-1	Panaphidini	Myzocallidina	Tuberculatus (Orientuberculoides) higuchii C	Korea	Seoul, Gwanak-gu, Seoul National University	37˚27'35''N 126˚57'06''E	16.iv.2014	Fagaceae	Quercus sp.	Yerim Lee & Hyoseok Lee
		33	32	Q87-n1	KY307255	140426YR2-Q87-n1	Panaphidini	Myzocallidina	Tuberculatus (Orientuberculoides) higuchii C	Korea	Seoul, Gwanak-gu, Seoul National University	37˚27'35''N 126˚57'06''E	16.iv.2014	Fagaceae	Quercus sp.	Yerim Lee & Hyoseok Lee
		116	105	Q30	KY307256	130820YR14-Q30	Panaphidini	Myzocallidina	Tuberculatus (Orientuberculoides) higuchii D	Korea	Gangwon-do, Chiak-Recreational forest	37˚15'21''N 128˚01'52''E	20.viii.2013	Fagaceae	Quercus sp.	Yerim Lee
		33	32	Q50	KY307257	140506YR3-Q50	Panaphidini	Myzocallidina	Tuberculatus (Orientuberculoides) higuchii D	Korea	Gyeonggi-do, Incheon-si, Gureob-Island	37˚11'29''N 125˚58'47''E	6.v.2014	Fagaceae	Quercus sp.	Yerim Lee & Hyoseok Lee
		28	27	Q56	KY307258	140516YR15-Q56	Panaphidini	Myzocallidina	Tuberculatus (Orientuberculoides) higuchii D	Korea	Gyeonggi-do, Yongin-si, Sinwon-ri	37˚18'47''N 127˚13'04''E	16.v.2014	Fagaceae	Quercus sp.	Yerim Lee
	28	74	72	Q62	KY307259	140603JG1-Q62	Panaphidini	Myzocallidina	Tuberculatus (Orientuberculoides) higuchii D	Korea	Gangwon-do, Yeongwol-gun, Beobheung-ri	37˚47'05''N 126˚42'28''E	3.vi.2014	Fagaceae	Quercus sp.	Jong-kook jung
		33	32	Q79	KY307260	050518SH69-Q79	Panaphidini	Myzocallidina	Tuberculatus (Orientuberculoides) higuchii D	Korea	Gyeongsangbuk-do	36˚29'30''N 128˚53'20''E	18.v.2005	Fagaceae	Quercus sp.	Seunghwan Lee
		33	32	Q85	KY307261	140430YR6-Q85	Panaphidini	Myzocallidina	Tuberculatus (Orientuberculoides) higuchii D	Korea	Gyeonggi-do, Suwon-si, SNU-arboretum	37˚15'43''N 126˚58'58''E	30.iv.2014	Fagaceae	Quercus sp.	Yerim Lee
3	15	40	37	Q34	KY307262	130908YR4-Q34	Panaphidini	Myzocallidina	Tuberculatus (Orientuberculoides) kashiwae A	Korea	Gangwon-do, Taebeak-si, Mt. Hambaeksan	37˚09'41''N 128˚55'03''E	28.x.2013	Fagaceae	Quercus sp.	Yerim Lee & Hyoseok Lee
		116	105	Q44-1	KY307263	131028YR1-Q44-1	Panaphidini	Myzocallidina	Tuberculatus (Orientuberculoides) kashiwae A	Korea	Seoul, Gwanak-gu, Seoul National University	37˚27'35''N 126˚57'06''E	28.x.2013	Fagaceae	Quercus sp.	Yerim Lee & Hyoseok Lee
	39	97	93	Q44-n1	KY307264	131028YR1-Q44-n1	Panaphidini	Myzocallidina	Tuberculatus (Orientuberculoides) kashiwae A	Korea	Seoul, Gwanak-gu, Seoul National University	37˚27'35''N 126˚57'06''E	28.x.2013	Fagaceae	Quercus sp.	Yerim Lee & Hyoseok Lee
		31	30	Q44-n3	KY307265	131028YR1-Q44-n3	Panaphidini	Myzocallidina	Tuberculatus (Orientuberculoides) kashiwae A	Korea	Seoul, Gwanak-gu, Seoul National University	37˚27'35''N 126˚57'06''E	28.x.2013	Fagaceae	Quercus sp.	Yerim Lee & Hyoseok Lee
	39	97	93	Q44-n2	KY307266	131028YR1-Q44-n2	Panaphidini	Myzocallidina	Tuberculatus (Orientuberculoides) kashiwae A	Korea	Seoul, Gwanak-gu, Seoul National University	37˚27'35''N 126˚57'06''E	28.x.2013	Fagaceae	Quercus sp.	Yerim Lee & Hyoseok Lee
		31	30	Q45	KY307267	131028YR1-Q45	Panaphidini	Myzocallidina	Tuberculatus (Orientuberculoides) kashiwae A	Korea	Seoul, Gwanak-gu, Seoul National University	37˚27'35''N 126˚57'06''E	28.x.2013	Fagaceae	Quercus sp.	Yerim Lee & Hyoseok Lee
		32	31	Q46	KY307268	131028YR1-Q46	Panaphidini	Myzocallidina	Tuberculatus (Orientuberculoides) kashiwae A	Korea	Seoul, Gwanak-gu, Seoul National University	37˚27'35''N 126˚57'06''E	8.ix.2013	Fagaceae	Quercus sp.	Yerim Lee & Hyoseok Lee
		32	31	Q49	KY307269	140501YR7-Q49	Panaphidini	Myzocallidina	Tuberculatus (Orientuberculoides) kashiwae A	Korea	Gangwon-do, Hwacheon-gun, Silnae-pass	38˚09'05''N 127˚31'02''E	1.v.2014	Fagaceae	Quercus sp.	Yerim Lee
		33	32	Q86	KY307270	140426YR10-Q86	Panaphidini	Myzocallidina	Tuberculatus (Orientuberculoides) kashiwae A	Korea	Seoul, Gwanak-gu, Seoul National University	37˚27'35''N 126˚57'06''E	28.x.2013	Fagaceae	Quercus sp.	Yerim Lee & Hyoseok Lee
		107	99	JP5-1	KY307271	050904-JP5-1	Panaphidini	Myzocallidina	Tuberculatus (Orientuberculoides) paiki	Japan	Hokkaido, Bibai	43˚19'58''N 141˚51'13''E	4.ix.2005	Fabaceae	Quercus dentata	unknown
		116	105	JG1	KY307272	150504YR-JG1	Panaphidini	Myzocallidina	Tuberculatus (Orientuberculoides) yokoyamai	Korea	Jeollanam-do, Suncheon-si, Mt. Jogyesan	35˚00'09''N 127˚18'49''E	4.v.2015	Fabaceae	Quercus dentata	Yerim Lee & Hyoseok Lee
6	42	101	97	JP5-2	KY307273	050904-JP5-2	Panaphidini	Myzocallidina	Tuberculatus (Orientuberculoides) yokoyamai	Japan	Hokkaido, Bibai	43˚19'58''N 141˚51'13''E	4.ix.2005	Fabaceae	Quercus dentata	unknown
11		124	111	Q1-1	KY307274	060511HJ2-Q1-1	Panaphidini	Myzocallidina	Tuberculatus (Orientuberculoides) yokoyamai	Korea	Gyeongsangnam-do, Sancheong-gun	35˚24'56''N 127˚52'24''E	11.v.2006	Fagaceae	Quercus sp.	Hyojoong Kim
		126	112	Q12	KY307275	120616HR2-Q12	Panaphidini	Myzocallidina	Tuberculatus (Orientuberculoides) yokoyamai	Korea	Gyeonggi-do, Gwangju-si, Mt. Taehwasan	37˚17'31''N 127˚17'19''E	16.vi.2012	Fagaceae	Quercus sp.	Hwalran Choi
		129	114	Q1-n1	KY307276	060511HJ2-Q1-n1	Panaphidini	Myzocallidina	Tuberculatus (Orientuberculoides) yokoyamai	Korea	Gyeongsangnam-do, Sancheong-gun	35˚24'56''N 127˚52'24''E	11.v.2006	Fagaceae	Quercus sp.	Hyojoong Kim
		116	105	Q26	KY307277	130725YR11-Q26	Panaphidini	Myzocallidina	Tuberculatus (Orientuberculoides) yokoyamai	Korea	Jeollanam-do, Gwangyang-si, Chusan-research forest	35˚01'56''N 127˚36'21''E	25.vii.2013	Fagaceae	Quercus sp.	Yerim Lee
		116	105	Q27	KY307278	130725YR15-Q27	Panaphidini	Myzocallidina	Tuberculatus (Orientuberculoides) yokoyamai	Korea	Jeollanam-do, Gwangyang-si, Chusan-research forest	35˚01'56''N 127˚36'21''E	25.vii.2013	Fagaceae	Quercus sp.	Yerim Lee
		29	28	Q53	KY307279	140516YR1-Q53	Panaphidini	Myzocallidina	Tuberculatus (Orientuberculoides) yokoyamai	Korea	Gyeonggi-do, Yongin-si, Sinwon-ri	37˚18'47''N 127˚13'04''E	16.v.2014	Fagaceae	Quercus sp.	Yerim Lee & Hyoseok Lee
	39	97	93	Q64	KY307280	140624YR17-Q64	Panaphidini	Myzocallidina	Tuberculatus (Orientuberculoides) yokoyamai	Korea	Gyeongsangbuk-do, Yeongyang-gun, Mt. Ilwolsan	36˚48'05''N 129˚05'53''E	24.vi.2014	Fagaceae	Quercus sp.	Yerim Lee
		110	101	Tub1	KY307281	15010YR2-Tub1	Panaphidini	Myzocallidina	Tuberculatus (Orientuberculoides) yokoyamai	Korea	Gyeonggi-do, Suwon-si, Mt. Gwanggyosan	37˚19'40''N 127˚00'54''E	10.v.2015	Fagaceae	Quercus aliena	Yerim Lee & Hyoseok Lee
				TY1-1	KY307282	150510YR-TY1-1	Panaphidini	Myzocallidina	Tuberculatus (Orientuberculoides) yokoyamai	Korea	Gyeonggi-do, Suwon-si, Mt. Gwanggyosan	37˚19'40''N 127˚00'54''E	11.v.2015	Fagaceae	Quercus aliena	Yerim Lee & Hyoseok Lee
				TY1-2	KY307283	150510YR-TY1-2	Panaphidini	Myzocallidina	Tuberculatus (Orientuberculoides) yokoyamai	Korea	Gyeonggi-do, Suwon-si, Mt. Gwanggyosan	37˚19'40''N 127˚00'54''E	11.v.2015	Fagaceae	Quercus aliena	Yerim Lee & Hyoseok Lee
		33	32	TY1-3	KY307284	150510YR-TY1-3	Panaphidini	Myzocallidina	Tuberculatus (Orientuberculoides) yokoyamai	Korea	Gyeonggi-do, Suwon-si, Mt. Gwanggyosan	37˚19'40''N 127˚00'54''E	11.v.2015	Fagaceae	Quercus aliena	Yerim Lee & Hyoseok Lee
8	46	114	104	TY1-4	KY307285	150510YR-TY1-4	Panaphidini	Myzocallidina	Tuberculatus (Orientuberculoides) yokoyamai	Korea	Gyeonggi-do, Suwon-si, Mt. Gwanggyosan	37˚19'40''N 127˚00'54''E	11.v.2015	Fagaceae	Quercus aliena	Yerim Lee & Hyoseok Lee
		115	104	TY1-5	KY307286	150510YR-TY1-5	Panaphidini	Myzocallidina	Tuberculatus (Orientuberculoides) yokoyamai	Korea	Gyeonggi-do, Suwon-si, Mt. Gwanggyosan	37˚19'40''N 127˚00'54''E	11.v.2015	Fagaceae	Quercus aliena	Yerim Lee & Hyoseok Lee
		119	107	TY1-6	KY307287	150510YR-TY1-6	Panaphidini	Myzocallidina	Tuberculatus (Orientuberculoides) yokoyamai	Korea	Gyeonggi-do, Suwon-si, Mt. Gwanggyosan	37˚19'40''N 127˚00'54''E	11.v.2015	Fagaceae	Quercus aliena	Yerim Lee & Hyoseok Lee
		119	107	TY1-n2	KY307288	150510YR-TY1-n2	Panaphidini	Myzocallidina	Tuberculatus (Orientuberculoides) yokoyamai	Korea	Gyeonggi-do, Suwon-si, Mt. Gwanggyosan	37˚19'40''N 127˚00'54''E	11.v.2015	Fagaceae	Quercus aliena	Yerim Lee & Hyoseok Lee
	48	120	108	TY2-1	KY307289	150510YR-TY2-1	Panaphidini	Myzocallidina	Tuberculatus (Orientuberculoides) yokoyamai	Korea	Gyeonggi-do, Suwon-si, Mt. Gwanggyosan	37˚19'40''N 127˚00'54''E	11.v.2015	Fagaceae	Quercus aliena	Yerim Lee & Hyoseok Lee
	48	120	108	TY2-n1	KY307290	150510YR-TY2-n1	Panaphidini	Myzocallidina	Tuberculatus (Orientuberculoides) yokoyamai	Korea	Gyeonggi-do, Suwon-si, Mt. Gwanggyosan	37˚19'40''N 127˚00'54''E	11.v.2015	Fagaceae	Quercus aliena	Yerim Lee & Hyoseok Lee
8	46	114	104	TY2-n2	KY307291	150510YR-TY2-n2	Panaphidini	Myzocallidina	Tuberculatus (Orientuberculoides) yokoyamai	Korea	Gyeonggi-do, Suwon-si, Mt. Gwanggyosan	37˚19'40''N 127˚00'54''E	11.v.2015	Fagaceae	Quercus aliena	Yerim Lee & Hyoseok Lee
	48	120	108	TY3	KY307292	150510YR-TY3	Panaphidini	Myzocallidina	Tuberculatus (Orientuberculoides) yokoyamai	Korea	Gyeonggi-do, Suwon-si, Mt. Gwanggyosan	37˚19'40''N 127˚00'54''E	21.v.2015	Fagaceae	Quercus aliena	Yerim Lee & Hyoseok Lee
		122	110	UCD1	KY307293	150722YR1-UCD1	Panaphidini	Myzocallidina	Tuberculatus (Pacificallis) californicus	USA	California, Davis, Shields Ave	38˚32'24''N 121˚45'00''E	22.vii.2015	Fagaceae	Quercus sp.	Yerim Lee & Hyoseok Lee
				UCD2	KY307294	150722YR2-UCD2	Panaphidini	Myzocallidina	Tuberculatus (Pacificallis) californicus	USA	California, Davis, Shields Ave	38˚32'24''N 121˚45'00''E	22.vii.2015	Fagaceae	Quercus sp.	Yerim Lee & Hyoseok Lee
12		128	114	UCD5	KY307295	150722YR5-UCD5	Panaphidini	Myzocallidina	Tuberculatus (Pacificallis) californicus	USA	California, Davis, Shields Ave	38˚32'24''N 121˚45'00''E	22.vii.2015	Fagaceae	Quercus sp.	Yerim Lee & Hyoseok Lee
				UCD3	KY307296	150722YR3-UCD3	Panaphidini	Myzocallidina	Tuberculatus (Pacificallis) columbiae	USA	California, Davis, Shields Ave	38˚32'24''N 121˚45'00''E	22.vii.2015	Fagaceae	Quercus sp.	Yerim Lee & Hyoseok Lee
7	45	108	99	Pol4	KY307297	150515MK-Pol4	Panaphidini	Myzocallidina	Tuberculatus (Tuberculatus) querceus	Poland	Katowice	50°15'53''N 19°01'25''E	15.v.2015	Fabaceae	Quercus robur	Mariusz Kanturski
7	45	108	99	Pol5	KY307298	150515MK-Pol5	Panaphidini	Myzocallidina	Tuberculatus (Tuberculatus) querceus	Poland	Katowice	50°15'53''N 19°01'25''E	15.v.2015	Fabaceae	Quercus robur	Mariusz Kanturski
				New4	KY307299	101120SH11-New4	Panaphidini	Myzocallidina	Tuberculatus (Tuberculoides) annulatus	New Zealand	Auckland	36˚53'25''S 174˚43'13''E	20.xi.2010	Fagaceae	Quercus sp.	Seunghwan Lee
		107	99	New6	KY307300	101120SH11-New6	Panaphidini	Myzocallidina	Tuberculatus (Tuberculoides) annulatus	New Zealand	Auckland	36˚53'25''S 174˚43'13''E	20.xi.2010	Fagaceae	Quercus sp.	Seunghwan Lee
		106	98	New8	KY307301	NZ101120SH30-New8	Panaphidini	Myzocallidina	Tuberculatus (Tuberculoides) annulatus	New Zealand	Auckland	36˚53'25''S 174˚43'13''E	20.xi.2010	Fagaceae	Quercus sp.	Seunghwan Lee
		126	112	Q13	KY307302	120623YR21-Q13	Panaphidini	Myzocallidina	Tuberculatus (Tuberculoides) annulatus	USA	California, San Marino, Oxford Rd	34˚07'40''N 118˚06'33''E	2.vi.2012	Fagaceae	Quercus sp.	Yerim Lee
12		128	114	UCD6-1	KY307303	150722YR6-UCD6-1	Panaphidini	Myzocallidina	Tuberculatus (Tuberculoides) annulatus	USA	California, Davis, Shields Ave	38˚32'24''N 121˚45'00''E	22.vii.2015	Fagaceae	Quercus sp.	Yerim Lee & Hyoseok Lee
12		128	114	UCD6-2	KY307304	150722YR6-UCD6-2	Panaphidini	Myzocallidina	Tuberculatus (Tuberculoides) annulatus	USA	California, Davis, Shields Ave	38˚32'24''N 121˚45'00''E	22.vii.2015	Fagaceae	Quercus sp.	Yerim Lee & Hyoseok Lee
		126	112	Pol9-5	KY307305	150616LD-Pol9-5	Panaphidini	Myzocallidina	Tuberculatus (Tuberculoides) remaudierei	Poland	Piekary Śląskie	50˚22'44''N 18˚55'37''E	16.vi.2015	Fabaceae	Quercus sp.	Ł. Depa
